# Supplementary material
Source: MDPI journal article supplement (https://www.mdpi.com/2673-964X/2/4/13)
Supplement: s1 [file s1]

**Table S2.** List of kelp-forest associated taxa reported per kelp species in Chile and Peru. The complete list of references can be found in **Table S1**.

| KELP                                          | COUNTRY | TAXA                               | PHYLUM        | REFERENCE                                           |
|-----------------------------------------------|---------|------------------------------------|---------------|-----------------------------------------------------|
| <i>Lessonia berteroana</i> /L. <i>spicata</i> | Chile   | <i>Acanthocyclus gayi</i>          | Arthropoda    | Cancino and Santelices (1984); Ortega et al. (2014) |
| <i>Lessonia berteroana</i> /L. <i>spicata</i> | Chile   | <i>Acanthocyclus hassleri</i>      | Arthropoda    | Cancino and Santelices (1984)                       |
| <i>Lessonia berteroana</i> /L. <i>spicata</i> | Chile   | <i>Acanthopleura echinata</i>      | Mollusca      | Cancino and Santelices (1984)                       |
| <i>Lessonia berteroana</i> /L. <i>spicata</i> | Chile   | <i>Allopetrolisthes angulosus</i>  | Arthropoda    | Cancino and Santelices (1984)                       |
| <i>Lessonia berteroana</i> /L. <i>spicata</i> | Chile   | <i>Allopetrolisthes punctatus</i>  | Arthropoda    | Cancino and Santelices (1984)                       |
| <i>Lessonia berteroana</i> /L. <i>spicata</i> | Chile   | <i>Allopetrolisthes spinifrons</i> | Arthropoda    | Cancino and Santelices (1984)                       |
| <i>Lessonia berteroana</i> /L. <i>spicata</i> | Chile   | <i>Alpheus chilensis</i>           | Arthropoda    | Cancino and Santelices (1984)                       |
| <i>Lessonia berteroana</i> /L. <i>spicata</i> | Chile   | Amphipoda                          | Arthropoda    | Ortega et al. (2014)                                |
| <i>Lessonia berteroana</i> /L. <i>spicata</i> | Chile   | <i>Anthothoe chilensis</i>         | Cnidaria      | Ortega et al. (2014)                                |
| <i>Lessonia berteroana</i> /L. <i>spicata</i> | Chile   | <i>Aora typica</i>                 | Arthropoda    | Winkler et al. (2017)                               |
| <i>Lessonia berteroana</i> /L. <i>spicata</i> | Chile   | <i>Athyonidium chilensis</i>       | Echinodermata | Ruiz et al. (2007); Gelcich et al. (2008)           |
| <i>Lessonia berteroana</i> /L. <i>spicata</i> | Chile   | <i>Notobalanus flosculus</i>       | Arthropoda    | Cancino and Santelices (1984)                       |
| <i>Lessonia berteroana</i> /L. <i>spicata</i> | Chile   | <i>Austromegabalanus psittacus</i> | Arthropoda    | Cancino and Santelices (1984)                       |
| <i>Lessonia berteroana</i> /L. <i>spicata</i> | Chile   | <i>Bircenna</i> sp.                | Arthropoda    | Gutow et al. (2021)                                 |

| KELP                                             | COUNTRY | TAXA                             | PHYLUM        | REFERENCE                                           |
|--------------------------------------------------|---------|----------------------------------|---------------|-----------------------------------------------------|
| <i>Lessonia berteroana</i> /L.<br><i>spicata</i> | Chile   | <i>Brachidontes granulatus</i>   | Mollusca      | Cancino and Santelices (1984); Ortega et al. (2014) |
| <i>Lessonia berteroana</i> /L.<br><i>spicata</i> | Chile   | <i>Chaetopleura peruviana</i>    | Mollusca      | Cancino and Santelices (1984); Ortega et al. (2014) |
| <i>Lessonia berteroana</i> /L.<br><i>spicata</i> | Chile   | <i>Chiton granosus</i>           | Mollusca      | Cancino and Santelices (1984); Ortega et al. (2014) |
| <i>Lessonia berteroana</i> /L.<br><i>spicata</i> | Chile   | <i>Chrysaora plocamia</i>        | Cnidaria      | Ceh and Riascos (2017)                              |
| <i>Lessonia berteroana</i> /L.<br><i>spicata</i> | Chile   | <i>Jehlius cirratus</i>          | Arthropoda    | Cancino and Santelices (1984)                       |
| <i>Lessonia berteroana</i> /L.<br><i>spicata</i> | Chile   | Cirripedia                       | Arthropoda    | Ortega et al. (2014)                                |
| <i>Lessonia berteroana</i> /L.<br><i>spicata</i> | Chile   | <i>Concholepas concholepas</i>   | Mollusca      | Ortiz et al. (2013); Cancino & Santelices (1984)    |
| <i>Lessonia berteroana</i> /L.<br><i>spicata</i> | Chile   | <i>Erichthonius brasiliensis</i> | Arthropoda    | Thiel and Vásquez (2000)                            |
| <i>Lessonia berteroana</i> /L.<br><i>spicata</i> | Chile   | <i>Fissurella</i> sp.            | Mollusca      | Ortega et al. (2014)                                |
| <i>Lessonia berteroana</i> /L.<br><i>spicata</i> | Chile   | <i>Fissurella</i> spp.           | Mollusca      | Ortiz et al. (2013)                                 |
| <i>Lessonia berteroana</i> /L.<br><i>spicata</i> | Chile   | <i>Fissurella</i> spp.           | Mollusca      | Cancino and Santelices (1984)                       |
| <i>Lessonia berteroana</i> /L.<br><i>spicata</i> | Chile   | <i>Gammaropsis typica</i>        | Arthropoda    | Thiel and Vásquez (2000)                            |
| <i>Lessonia berteroana</i> /L.<br><i>spicata</i> | Chile   | <i>Heliaster helianthus</i>      | Echinodermata | Ortiz et al. (2013)                                 |
| <i>Lessonia berteroana</i> /L.<br><i>spicata</i> | Chile   | <i>Hemigrapsus crenulatus</i>    | Arthropoda    | Ortega et al. (2014)                                |
| <i>Lessonia berteroana</i> /L.<br><i>spicata</i> | Chile   | Isopoda                          | Arthropoda    | Ortega et al. (2014)                                |

| KELP                                   | COUNTRY | TAXA                             | PHYLUM        | REFERENCE                                                   |
|----------------------------------------|---------|----------------------------------|---------------|-------------------------------------------------------------|
| <i>Lessonia berteroaana/L. spicata</i> | Chile   | Isopoda no det.                  | Arthropoda    | Ortega et al. (2014)                                        |
| <i>Lessonia berteroaana/L. spicata</i> | Chile   | <i>Lottia orbigny</i>            | Mollusca      | Ortega et al. (2014)                                        |
| <i>Lessonia berteroaana/L. spicata</i> | Chile   | <i>Loxechinus albus</i>          | Echinodermata | González et al. (2008); Ortiz et al. (2013)                 |
| <i>Lessonia berteroaana/L. spicata</i> | Chile   | Lumbrineridae                    | Annelida      | Ortega et al. (2014)                                        |
| <i>Lessonia berteroaana/L. spicata</i> | Chile   | <i>Lutra felina</i>              | Chordata      | Castilla and Bahamondes (1979); Medina-Vogel et al. (2004); |
| <i>Lessonia berteroaana/L. spicata</i> | Chile   | <i>Quadrimaera incerta</i>       | Arthropoda    | Thiel and Vásquez (2000)                                    |
| <i>Lessonia berteroaana/L. spicata</i> | Chile   | <i>Medialuna ancietae</i>        | Chordata      | Lozano-Muñoz et al. (2021)                                  |
| <i>Lessonia berteroaana/L. spicata</i> | Chile   | Nereididae                       | Annelida      | Ortega et al. (2014)                                        |
| <i>Lessonia berteroaana/L. spicata</i> | Chile   | <i>Orchestoidea tuberculata</i>  | Arthropoda    | Duarte et al. (2008); Duarte et al. (2009)                  |
| <i>Lessonia berteroaana/L. spicata</i> | Chile   | <i>Pachycheles grossimanus</i>   | Arthropoda    | Cancino and Santelices (1984)                               |
| <i>Lessonia berteroaana/L. spicata</i> | Chile   | <i>Parhyalella penai</i>         | Arthropoda    | Winkler et al. (2017)                                       |
| <i>Lessonia berteroaana/L. spicata</i> | Chile   | <i>Sunamphitoe femorata</i>      | Arthropoda    | Thiel and Vásquez (2000)                                    |
| <i>Lessonia berteroaana/L. spicata</i> | Chile   | <i>Perumytilus purpuratus</i>    | Mollusca      | Cancino and Santelices (1984); Ortega et al. (2014)         |
| <i>Lessonia berteroaana/L. spicata</i> | Chile   | <i>Petrolisthes tuberculatus</i> | Arthropoda    | Cancino and Santelices (1984)                               |

| KELP                                             | COUNTRY | TAXA                              | PHYLUM        | REFERENCE                                                                |
|--------------------------------------------------|---------|-----------------------------------|---------------|--------------------------------------------------------------------------|
| <i>Lessonia berteroana</i> /L.<br><i>spicata</i> | Chile   | <i>Phalerisida maculata</i>       | Arthropoda    | González et al. (2008)                                                   |
| <i>Lessonia berteroana</i> /L.<br><i>spicata</i> | Chile   | <i>Phalerisida maculata</i>       | Arthropoda    | Jaramillo et al. (2006)                                                  |
| <i>Lessonia berteroana</i> /L.<br><i>spicata</i> | Chile   | Phyllodocidae                     | Annelida      | Ortega et al. (2014)                                                     |
| <i>Lessonia berteroana</i> /L.<br><i>spicata</i> | Chile   | <i>Phymactis clematis</i>         | Cnidaria      | Cancino and Santelices (1984); Ortega et al. (2014)                      |
| <i>Lessonia berteroana</i> /L.<br><i>spicata</i> | Chile   | <i>Pilumnoides perlatus</i>       | Arthropoda    | Cancino and Santelices (1984)                                            |
| <i>Lessonia berteroana</i> /L.<br><i>spicata</i> | Chile   | Polynoidae                        | Annelida      | Ortega et al. (2014)                                                     |
| <i>Lessonia berteroana</i> /L.<br><i>spicata</i> | Chile   | Pycnogonida no det.               | Arthropoda    | Ortega et al. (2014)                                                     |
| <i>Lessonia berteroana</i> /L.<br><i>spicata</i> | Chile   | <i>Pyura praeputialis</i>         | Chordata      | Ortiz et al. (2013)                                                      |
| <i>Lessonia berteroana</i> /L.<br><i>spicata</i> | Chile   | Sabellariidae                     | Annelida      | Ortega et al. (2014)                                                     |
| <i>Lessonia berteroana</i> /L.<br><i>spicata</i> | Chile   | <i>Schroederichthys chilensis</i> | Chordata      | Fariña and Ojeda (1993)                                                  |
| <i>Lessonia berteroana</i> /L.<br><i>spicata</i> | Chile   | <i>Scurria scurra</i>             | Mollusca      | Cancino and Santelices (1984)                                            |
| <i>Lessonia berteroana</i> /L.<br><i>spicata</i> | Chile   | <i>Semimytilus patagonicus</i>    | Mollusca      | Cancino and Santelices (1984); Ortiz et al. (2013); Ortega et al. (2014) |
| <i>Lessonia berteroana</i> /L.<br><i>spicata</i> | Chile   | <i>Sporocladopsis</i> sp.         | Chlorophyta   | Martinez and Correa (1993)                                               |
| <i>Lessonia berteroana</i> /L.<br><i>spicata</i> | Chile   | <i>Stichaster striatus</i>        | Echinodermata | Cancino and Santelices (1984); Gelcich et al. (2008)                     |

| KELP                                           | COUNTRY | TAXA                               | PHYLUM        | REFERENCE                                         |
|------------------------------------------------|---------|------------------------------------|---------------|---------------------------------------------------|
| <i>Lessonia berteroa</i> /L.<br><i>spicata</i> | Chile   | <i>Sunamphitoe lessoniophila</i>   | Arthropoda    | Pérez-Schultheiss (2018); Gutow et al. (2020)     |
| <i>Lessonia berteroa</i> /L.<br><i>spicata</i> | Chile   | Syllidae no det.                   | Annelida      | Ortega et al. (2014)                              |
| <i>Lessonia berteroa</i> /L.<br><i>spicata</i> | Chile   | <i>Tegula atra</i>                 | Mollusca      | Cancino and Santelices (1984)                     |
| <i>Lessonia berteroa</i> /L.<br><i>spicata</i> | Chile   | Terebellidae no det.               | Annelida      | Ortega et al. (2014)                              |
| <i>Lessonia berteroa</i> /L.<br><i>spicata</i> | Chile   | <i>Tetrapyrgus niger</i>           | Echinodermata | Ortiz et al. (2013)                               |
| <i>Lessonia berteroa</i> /L.<br><i>spicata</i> | Chile   | <i>Tonicia</i> sp.                 | Mollusca      | Cancino and Santelices (1984)                     |
| <i>Lessonia berteroa</i> /L.<br><i>spicata</i> | Chile   | <i>Tylos spinulosus</i>            | Arthropoda    | Jaramillo et al. (2006)                           |
| <i>Lessonia berteroa</i> /L.<br><i>spicata</i> | Chile   | <i>Ventojassa frequens</i>         | Arthropoda    | Thiel and Vásquez (2000)                          |
| <i>Lessonia trabeculata</i>                    | Chile   | <i>Acanthistius pictus</i>         | Chordata      | Angel and Ojeda (2001); Pérez-Matus et al. (2007) |
| <i>Lessonia trabeculata</i>                    | Chile   | <i>Acanthocyclus gayi</i>          | Arthropoda    | Carrasco et al. (2017)                            |
| <i>Lessonia trabeculata</i>                    | Peru    | <i>Acanthopleura echinata</i>      | Mollusca      | Carbajal et al. (2021)                            |
| <i>Lessonia trabeculata</i>                    | Chile   | <i>Acanthopleura echinata</i>      | Mollusca      | Gelcich et al. (2008)                             |
| <i>Lessonia trabeculata</i>                    | Peru    | Actiniaria no det. 3               | Cnidaria      | Carbajal et al. (2021)                            |
| <i>Lessonia trabeculata</i>                    | Peru    | Actiniaria no det. 4               | Cnidaria      | Carbajal et al. (2021)                            |
| <i>Lessonia trabeculata</i>                    | Peru    | <i>Allopetrolisthes angulosus</i>  | Arthropoda    | Carbajal et al. (2021)                            |
| <i>Lessonia trabeculata</i>                    | Peru    | <i>Allopetrolisthes punctatus</i>  | Arthropoda    | Carbajal et al. (2021)                            |
| <i>Lessonia trabeculata</i>                    | Peru    | <i>Allopetrolisthes spinifrons</i> | Arthropoda    | Carbajal et al. (2021)                            |
| <i>Lessonia trabeculata</i>                    | Chile   | <i>Allopetrolisthes</i> spp.       | Arthropoda    | Carrasco et al. (2017)                            |

| KELP                        | COUNTRY | TAXA                               | PHYLUM        | REFERENCE                                                                                         |
|-----------------------------|---------|------------------------------------|---------------|---------------------------------------------------------------------------------------------------|
| <i>Lessonia trabeculata</i> | Peru    | Alpheidae no det.                  | Arthropoda    | Carbajal et al. (2021)                                                                            |
| <i>Lessonia trabeculata</i> | Peru    | <i>Alpheus chilensis</i>           | Arthropoda    | Carbajal et al. (2021)                                                                            |
| <i>Lessonia trabeculata</i> | Peru    | <i>Alpheus inca</i>                | Arthropoda    | Carbajal et al. (2021)                                                                            |
| <i>Lessonia trabeculata</i> | Peru    | Amphipoda no det.                  | Arthropoda    | Carbajal et al. (2021)                                                                            |
| <i>Lessonia trabeculata</i> | Chile   | <i>Anemonia alicemartinae</i>      | Cnidaria      | Häussermann and Försterra (2001); Villegas et al. (2008)                                          |
| <i>Lessonia trabeculata</i> | Chile   | <i>Anisotremus scapularis</i>      | Chordata      | Angel and Ojeda (2001); Pérez-Matus et al. (2007)                                                 |
| <i>Lessonia trabeculata</i> | Chile   | <i>Anthothoe chilensis</i>         | Cnidaria      | Villegas et al. (2008)                                                                            |
| <i>Lessonia trabeculata</i> | Chile   | <i>Aora typica</i>                 | Arthropoda    | Thiel and Vásquez (2000)                                                                          |
| <i>Lessonia trabeculata</i> | Chile   | <i>Aphos porosus</i>               | Chordata      | Angel and Ojeda (2001)                                                                            |
| <i>Lessonia trabeculata</i> | Chile   | <i>Aplodactylus punctatus</i>      | Chordata      | Cáceres et al. (1993); Benavides et al. (1994); Angel and Ojeda (2001); Pérez-Matus et al. (2007) |
| <i>Lessonia trabeculata</i> | Peru    | <i>Arbacia spatuligera</i>         | Echinodermata | Carbajal et al. (2021)                                                                            |
| <i>Lessonia trabeculata</i> | Chile   | <i>Asparagopsis armata</i>         | Rhodophyta    | Vega et al. (2005)                                                                                |
| <i>Lessonia trabeculata</i> | Chile   | <i>Athyonidium chilensis</i>       | Echinodermata | Gelcich et al. (2008)                                                                             |
| <i>Lessonia trabeculata</i> | Chile   | <i>Auchenionchus microcirrhis</i>  | Chordata      | Angel and Ojeda (2001)                                                                            |
| <i>Lessonia trabeculata</i> | Peru    | <i>Aulacomya atra</i>              | Mollusca      | Carbajal et al. (2021)                                                                            |
| <i>Lessonia trabeculata</i> | Chile   | <i>Aulacomya atra</i>              | Mollusca      | Villegas et al. (2008)                                                                            |
| <i>Lessonia trabeculata</i> | Chile   | <i>Austrolittorina araucana</i>    | Mollusca      | Carrasco et al. (2017)                                                                            |
| <i>Lessonia trabeculata</i> | Peru    | <i>Austromegabalanus psittacus</i> | Arthropoda    | Carbajal et al. (2021)                                                                            |
| <i>Lessonia trabeculata</i> | Chile   | <i>Austromegabalanus psittacus</i> | Arthropoda    | Gelcich et al. (2008)                                                                             |

| KELP                        | COUNTRY | TAXA                              | PHYLUM     | REFERENCE                                         |
|-----------------------------|---------|-----------------------------------|------------|---------------------------------------------------|
| <i>Lessonia trabeculata</i> | Chile   | <i>Notobalanus flosculus</i>      | Arthropoda | Gelcich et al. (2008)                             |
| <i>Lessonia trabeculata</i> | Peru    | <i>Balanus laevis</i>             | Arthropoda | Carbajal et al. (2021)                            |
| <i>Lessonia trabeculata</i> | Chile   | <i>Balanus laevis</i>             | Arthropoda | Gelcich et al. (2008)                             |
| <i>Lessonia trabeculata</i> | Peru    | <i>Balanus</i> sp.                | Arthropoda | Carbajal et al. (2021)                            |
| <i>Lessonia trabeculata</i> | Peru    | <i>Betaeus</i> sp.                | Arthropoda | Carbajal et al. (2021)                            |
| <i>Lessonia trabeculata</i> | Chile   | <i>Bossiella chilensis</i>        | Rhodophyta | Gelcich et al. (2008)                             |
| <i>Lessonia trabeculata</i> | Peru    | <i>Brachidontes granulatus</i>    | Mollusca   | Carbajal et al. (2021)                            |
| <i>Lessonia trabeculata</i> | Peru    | <i>Caecum chilense</i>            | Mollusca   | Carbajal et al. (2021)                            |
| <i>Lessonia trabeculata</i> | Chile   | <i>Callorhinchus callorynchus</i> | Chordata   | Angel and Ojeda (2001)                            |
| <i>Lessonia trabeculata</i> | Chile   | <i>Cancer plebejus</i>            | Arthropoda | Villegas et al. (2008)                            |
| <i>Lessonia trabeculata</i> | Chile   | <i>Pseudograpsus setosus</i>      | Arthropoda | Villegas et al. (2008)                            |
| <i>Lessonia trabeculata</i> | Peru    | Cancridae no det.                 | Arthropoda | Carbajal et al. (2021)                            |
| <i>Lessonia trabeculata</i> | Peru    | <i>Caprella</i> sp. 2             | Arthropoda | Carbajal et al. (2021)                            |
| <i>Lessonia trabeculata</i> | Peru    | <i>Carditella tegulata</i>        | Mollusca   | Carbajal et al. (2021)                            |
| <i>Lessonia trabeculata</i> | Chile   | <i>Ceramium</i> spp.              | Rhodophyta | Gelcich et al. (2008)                             |
| <i>Lessonia trabeculata</i> | Chile   | <i>Cheilodactylus variegatus</i>  | Chordata   | Angel and Ojeda (2001); Pérez-Matus et al. (2007) |
| <i>Lessonia trabeculata</i> | Peru    | <i>Chiton cumingsii</i>           | Mollusca   | Carbajal et al. (2021)                            |
| <i>Lessonia trabeculata</i> | Chile   | <i>Chiton granosus</i>            | Mollusca   | Villegas et al. (2008)                            |
| <i>Lessonia trabeculata</i> | Chile   | <i>Mazzaella canaliculata</i>     | Rhodophyta | Vega et al. (2005); Gelcich et al. (2008)         |
| <i>Lessonia trabeculata</i> | Chile   | <i>Choromytilus chorus</i>        | Mollusca   | Carrasco et al. (2017)                            |
| <i>Lessonia trabeculata</i> | Chile   | <i>Chromis crusma</i>             | Chordata   | Angel and Ojeda (2001); Carrasco et al. (2017)    |

| KELP                        | COUNTRY | TAXA                             | PHYLUM        | REFERENCE                                                             |
|-----------------------------|---------|----------------------------------|---------------|-----------------------------------------------------------------------|
| <i>Lessonia trabeculata</i> | Chile   | <i>Chrysaora plocamia</i>        | Cnidaria      | Ceh and Riascos (2017)                                                |
| <i>Lessonia trabeculata</i> | Chile   | <i>Cilus gilberti</i>            | Chordata      | Angel and Ojeda (2001)                                                |
| <i>Lessonia trabeculata</i> | Peru    | Cirratulidae no det.             | Annelida      | Carbajal et al. (2021)                                                |
| <i>Lessonia trabeculata</i> | Chile   | <i>Codium dimorphum</i>          | Chlorophyta   | Gelcich et al. (2008)                                                 |
| <i>Lessonia trabeculata</i> | Chile   | <i>Colpomenia sinuosa</i>        | Ochrophyta    | Gelcich et al. (2008)                                                 |
| <i>Lessonia trabeculata</i> | Peru    | <i>Concholepas concholepas</i>   | Mollusca      | Carbajal et al. (2021)                                                |
| <i>Lessonia trabeculata</i> | Chile   | <i>Concholepas concholepas</i>   | Mollusca      | Gelcich et al. (2008); Villegas et al. (2008); Carrasco et al. (2017) |
| <i>Lessonia trabeculata</i> | Chile   | <i>Corallina officinalis</i>     | Rhodophyta    | Gelcich et al. (2008)                                                 |
| <i>Lessonia trabeculata</i> | Peru    | <i>Crassilabrum crassilabrum</i> | Mollusca      | Carbajal et al. (2021)                                                |
| <i>Lessonia trabeculata</i> | Chile   | <i>Crassilabrum crassilabrum</i> | Mollusca      | Villegas et al. (2008)                                                |
| <i>Lessonia trabeculata</i> | Peru    | <i>Crepidatella peruviana</i>    | Mollusca      | Carbajal et al. (2021)                                                |
| <i>Lessonia trabeculata</i> | Peru    | <i>Crucibulum</i> sp.            | Mollusca      | Carbajal et al. (2021)                                                |
| <i>Lessonia trabeculata</i> | Chile   | <i>Rhodymenia skottsbergii</i>   | Rhodophyta    | Gelcich et al. (2008)                                                 |
| <i>Lessonia trabeculata</i> | Peru    | <i>Dipolydora socialis</i>       | Annelida      | Carbajal et al. (2021)                                                |
| <i>Lessonia trabeculata</i> | Peru    | <i>Discinisca lamellosa</i>      | Brachiopoda   | Carbajal et al. (2021)                                                |
| <i>Lessonia trabeculata</i> | Chile   | <i>Eatoniella nigra</i>          | Mollusca      | Carrasco et al. (2017)                                                |
| <i>Lessonia trabeculata</i> | Peru    | Echinacea no det.                | Echinodermata | Carbajal et al. (2021)                                                |
| <i>Lessonia trabeculata</i> | Chile   | <i>Erichthonius brasiliensis</i> | Arthropoda    | Thiel and Vásquez (2000)                                              |
| <i>Lessonia trabeculata</i> | Peru    | <i>Eulalia</i> sp.               | Annelida      | Carbajal et al. (2021)                                                |
| <i>Lessonia trabeculata</i> | Chile   | <i>Eulithidium umbilicatum</i>   | Mollusca      | Carrasco et al. (2017)                                                |
| <i>Lessonia trabeculata</i> | Peru    | <i>Eurhomalea lenticularis</i>   | Mollusca      | Carbajal et al. (2021)                                                |



| KELP                        | COUNTRY | TAXA                             | PHYLUM     | REFERENCE                                         |
|-----------------------------|---------|----------------------------------|------------|---------------------------------------------------|
| <i>Lessonia trabeculata</i> | Peru    | <i>Eurhomalea rufa</i>           | Mollusca   | Carbajal et al. (2021)                            |
| <i>Lessonia trabeculata</i> | Peru    | <i>Eurypanopeus crenatus</i>     | Arthropoda | Carbajal et al. (2021)                            |
| <i>Lessonia trabeculata</i> | Chile   | <i>Fissurella latimarginata</i>  | Mollusca   | Villegas et al. (2008)                            |
| <i>Lessonia trabeculata</i> | Peru    | <i>Fissurella cumingi</i>        | Mollusca   | Carbajal et al. (2021)                            |
| <i>Lessonia trabeculata</i> | Chile   | <i>Fissurella cumingi</i>        | Mollusca   | Villegas et al. (2008)                            |
| <i>Lessonia trabeculata</i> | Peru    | <i>Fissurella latimarginata</i>  | Mollusca   | Carbajal et al. (2021)                            |
| <i>Lessonia trabeculata</i> | Peru    | <i>Fissurella limbata</i>        | Mollusca   | Carbajal et al. (2021)                            |
| <i>Lessonia trabeculata</i> | Peru    | <i>Fissurella peruviana</i>      | Mollusca   | Carbajal et al. (2021)                            |
| <i>Lessonia trabeculata</i> | Chile   | <i>Fissurella</i> spp.           | Mollusca   | Gelcich et al. (2008)                             |
| <i>Lessonia trabeculata</i> | Peru    | Gammaridea no det.               | Arthropoda | Carbajal et al. (2021)                            |
| <i>Lessonia trabeculata</i> | Chile   | <i>Gammaropsis typica</i>        | Arthropoda | Thiel and Vásquez (2000)                          |
| <i>Lessonia trabeculata</i> | Chile   | <i>Gaudichaudia gaudichaudii</i> | Arthropoda | Gelcich et al. (2008)                             |
| <i>Lessonia trabeculata</i> | Peru    | <i>Gaudichaudia gaudichaudii</i> | Arthropoda | Carbajal et al. (2021)                            |
| <i>Lessonia trabeculata</i> | Chile   | <i>Gelidium</i> spp.             | Rhodophyta | Gelcich et al. (2008)                             |
| <i>Lessonia trabeculata</i> | Chile   | <i>Genypterus chilensis</i>      | Chordata   | Pérez-Matus et al. (2007)                         |
| <i>Lessonia trabeculata</i> | Chile   | <i>Girella laevisfrons</i>       | Chordata   | Angel and Ojeda (2001); Pérez-Matus et al. (2007) |
| <i>Lessonia trabeculata</i> | Chile   | <i>Dictyota kunthii</i>          | Ochrophyta | Gelcich et al. (2008)                             |
| <i>Lessonia trabeculata</i> | Chile   | <i>Graus nigra</i>               | Chordata   | Pérez-Matus et al. (2007)                         |
| <i>Lessonia trabeculata</i> | Chile   | <i>Halicarcinus</i> spp          | Arthropoda | Carrasco et al. (2017)                            |
| <i>Lessonia trabeculata</i> | Chile   | <i>Halopteris hordacea</i>       | Ochrophyta | Gelcich et al. (2008)                             |
| <i>Lessonia trabeculata</i> | Chile   | <i>Halopteris</i> spp.           | Ochrophyta | Vega et al. (2005)                                |
| <i>Lessonia trabeculata</i> | Peru    | <i>Halosydna johnsoni</i>        | Annelida   | Carbajal et al. (2021)                            |

| KELP                        | COUNTRY | TAXA                               | PHYLUM        | REFERENCE                                          |
|-----------------------------|---------|------------------------------------|---------------|----------------------------------------------------|
| <i>Lessonia trabeculata</i> | Peru    | <i>Harmothoe</i> sp.               | Annelida      | Carbajal et al. (2021)                             |
| <i>Lessonia trabeculata</i> | Peru    | Harpacticoida no det.              | Arthropoda    | Carbajal et al. (2021)                             |
| <i>Lessonia trabeculata</i> | Chile   | <i>Helcogrammoides cunninghami</i> | Chordata      | Pérez-Matus et al. (2016)                          |
| <i>Lessonia trabeculata</i> | Chile   | <i>Helcogrammoides</i> spp.        | Chordata      | Carrasco et al. (2017)                             |
| <i>Lessonia trabeculata</i> | Peru    | <i>Heliaster helianthus</i>        | Echinodermata | Carbajal et al. (2021)                             |
| <i>Lessonia trabeculata</i> | Chile   | <i>Heliaster helianthus</i>        | Echinodermata | Villegas et al. (2008); Gelcich et al. (2008)      |
| <i>Lessonia trabeculata</i> | Chile   | <i>Hemilutjanus macrophthalmos</i> | Chordata      | Angel and Ojeda (2001); Pérez-Matus et al. (2007)  |
| <i>Lessonia trabeculata</i> | Peru    | <i>Hiatella arctica</i>            | Mollusca      | Carbajal et al. (2021)                             |
| <i>Lessonia trabeculata</i> | Chile   | <i>Hildenbrandia lecanelliieri</i> | Rhodophyta    | Gelcich et al. (2008)                              |
| <i>Lessonia trabeculata</i> | Chile   | <i>Hippoglossina macrops</i>       | Chordata      | Angel and Ojeda (2001)                             |
| <i>Lessonia trabeculata</i> | Chile   | <i>Homalaspis plana</i>            | Arthropoda    | Gelcich et al. (2008)                              |
| <i>Lessonia trabeculata</i> | Chile   | <i>Hymenena durvillaei</i>         | Rhodophyta    | Gelcich et al. (2008)                              |
| <i>Lessonia trabeculata</i> | Chile   | <i>Isacia conceptionis</i>         | Chordata      | Angel and Ojeda (2001); Carrasco et al. (2017)     |
| <i>Lessonia trabeculata</i> | Peru    | <i>Isocheles pacificus</i>         | Arthropoda    | Carbajal et al. (2021)                             |
| <i>Lessonia trabeculata</i> | Peru    | Isopoda no det.                    | Arthropoda    | Carbajal et al. (2021)                             |
| <i>Lessonia trabeculata</i> | Chile   | <i>Labrisomus philippii</i>        | Chordata      | Angel and Ojeda (2001); Carrasco et al. (2017)     |
| <i>Lessonia trabeculata</i> | Peru    | <i>Liopetrolisthes mitra</i>       | Arthropoda    | Carbajal et al. (2021)                             |
| <i>Lessonia trabeculata</i> | Chile   | <i>Lithothamnionoides</i> sp.      | Rhodophyta    | Hinojosa et al. (2010)                             |
| <i>Lessonia trabeculata</i> | Peru    | <i>Loxechinus albus</i>            | Echinodermata | Carbajal et al. (2021)                             |
| <i>Lessonia trabeculata</i> | Chile   | <i>Loxechinus albus</i>            | Echinodermata | Vásquez (2007); Villegas et al. (2008); Gelcich et |

| KELP                        | COUNTRY | TAXA                             | PHYLUM        | REFERENCE                                                       |
|-----------------------------|---------|----------------------------------|---------------|-----------------------------------------------------------------|
|                             |         |                                  |               | al. (2008);<br>González et al.<br>(2008); Vega et al.<br>(2005) |
| <i>Lessonia trabeculata</i> | Peru    | <i>Luidia magellanica</i>        | Echinodermata | Carbajal et al.<br>(2021)                                       |
| <i>Lessonia trabeculata</i> | Chile   | <i>Luidia magellanica</i>        | Echinodermata | Villegas et al.<br>(2008)                                       |
| <i>Lessonia trabeculata</i> | Peru    | <i>Lumbrineris</i> sp.           | Annelida      | Carbajal et al.<br>(2021)                                       |
| <i>Lessonia trabeculata</i> | Chile   | <i>Quadrimaera incerta</i>       | Arthropoda    | Thiel and Vásquez<br>(2000)                                     |
| <i>Lessonia trabeculata</i> | Peru    | Majoidea no det.                 | Arthropoda    | Carbajal et al.<br>(2021)                                       |
| <i>Lessonia trabeculata</i> | Peru    | <i>Marphysa</i> sp.              | Annelida      | Carbajal et al.<br>(2021)                                       |
| <i>Lessonia trabeculata</i> | Chile   | <i>Medialuna ancietae</i>        | Chordata      | Pérez-Matus et al.<br>(2007)                                    |
| <i>Lessonia trabeculata</i> | Peru    | <i>Megalobrachium peruvianum</i> | Arthropoda    | Carbajal et al.<br>(2021)                                       |
| <i>Lessonia trabeculata</i> | Chile   | <i>Membranipora isabelleana</i>  | Bryozoa       | Manriquez and<br>Cancino (1996)                                 |
| <i>Lessonia trabeculata</i> | Chile   | <i>Menticirrhus ophicephalus</i> | Chordata      | Angel and Ojeda<br>(2001)                                       |
| <i>Lessonia trabeculata</i> | Chile   | <i>Meyenaster gelatinosus</i>    | Echinodermata | Gelcich et al.<br>(2008)                                        |
| <i>Lessonia trabeculata</i> | Peru    | <i>Alia unifasciata</i>          | Mollusca      | Carbajal et al.<br>(2021)                                       |
| <i>Lessonia trabeculata</i> | Chile   | <i>Mugil cephalus</i>            | Chordata      | Angel and Ojeda<br>(2001)                                       |
| <i>Lessonia trabeculata</i> | Chile   | <i>Mustelus whitneyi</i>         | Chordata      | Angel and Ojeda<br>(2001)                                       |
| <i>Lessonia trabeculata</i> | Chile   | <i>Myxodes</i> spp.              | Chordata      | Carrasco et al.<br>(2017)                                       |
| <i>Lessonia trabeculata</i> | Chile   | <i>Myxodes viridis</i>           | Chordata      | Ruz et al. (2020);<br>Angel & Ojeda<br>(2001)                   |
| <i>Lessonia trabeculata</i> | Peru    | <i>Naineris</i> sp.              | Annelida      | Carbajal et al.<br>(2021)                                       |
| <i>Lessonia trabeculata</i> | Peru    | <i>Nassarius gayi</i>            | Mollusca      | Carbajal et al.<br>(2021)                                       |
| <i>Lessonia trabeculata</i> | Peru    | Nemertea no det.                 | Nemertea      | Carbajal et al.<br>(2021)                                       |
| <i>Lessonia trabeculata</i> | Peru    | Nereidae no det.                 | Annelida      | Carbajal et al.<br>(2021)                                       |

| KELP                        | COUNTRY | TAXA                            | PHYLUM        | REFERENCE                                         |
|-----------------------------|---------|---------------------------------|---------------|---------------------------------------------------|
| <i>Lessonia trabeculata</i> | Peru    | <i>Nereis</i> sp. 2             | Annelida      | Carbajal et al. (2021)                            |
| <i>Lessonia trabeculata</i> | Peru    | <i>Nereis</i> sp. 3             | Annelida      | Carbajal et al. (2021)                            |
| <i>Lessonia trabeculata</i> | Peru    | <i>Nereis</i> sp.1              | Annelida      | Carbajal et al. (2021)                            |
| <i>Lessonia trabeculata</i> | Chile   | <i>Nexilosus latifrons</i>      | Chordata      | Angel and Ojeda (2001); Pérez-Matus et al. (2007) |
| <i>Lessonia trabeculata</i> | Chile   | <i>Notocheirus hubbsi</i>       | Chordata      | Carrasco et al. (2017)                            |
| <i>Lessonia trabeculata</i> | Peru    | Nudibranchia no det.            | Mollusca      | Carbajal et al. (2021)                            |
| <i>Lessonia trabeculata</i> | Chile   | <i>Odontaster penicillatus</i>  | Echinodermata | Gelcich et al. (2008)                             |
| <i>Lessonia trabeculata</i> | Peru    | Ophiurida no det.               | Echinodermata | Carbajal et al. (2021)                            |
| <i>Lessonia trabeculata</i> | Chile   | <i>Oplegnathus insignis</i>     | Chordata      | Pérez-Matus et al. (2007)                         |
| <i>Lessonia trabeculata</i> | Chile   | <i>Orchestoidea tuberculata</i> | Arthropoda    | Duarte et al. (2014)                              |
| <i>Lessonia trabeculata</i> | Peru    | <i>Pachycheles crinimanus</i>   | Arthropoda    | Carbajal et al. (2021)                            |
| <i>Lessonia trabeculata</i> | Peru    | <i>Pachycheles grossimanus</i>  | Arthropoda    | Carbajal et al. (2021)                            |
| <i>Lessonia trabeculata</i> | Peru    | <i>Tetralobistes weddellii</i>  | Arthropoda    | Carbajal et al. (2021)                            |
| <i>Lessonia trabeculata</i> | Peru    | <i>Tetralobistes weddellii</i>  | Arthropoda    | Carbajal et al. (2021)                            |
| <i>Lessonia trabeculata</i> | Peru    | <i>Pagurus</i> sp.              | Arthropoda    | Carbajal et al. (2021)                            |
| <i>Lessonia trabeculata</i> | Chile   | <i>Pagurus</i> spp.             | Arthropoda    | Carrasco et al. (2017)                            |
| <i>Lessonia trabeculata</i> | Peru    | <i>Pagurus villosus</i>         | Arthropoda    | Carbajal et al. (2021)                            |
| <i>Lessonia trabeculata</i> | Chile   | <i>Paralabrax humeralis</i>     | Chordata      | Angel and Ojeda (2001); Pérez-Matus et al. (2007) |
| <i>Lessonia trabeculata</i> | Chile   | <i>Paralichthys microps</i>     | Chordata      | Angel and Ojeda (2001); Pérez-Matus et al. (2007) |
| <i>Lessonia trabeculata</i> | Chile   | <i>Paraxanthus barbiger</i>     | Arthropoda    | Villegas et al. (2008); Carrasco et al. (2017)    |

| KELP                        | COUNTRY | TAXA                              | PHYLUM        | REFERENCE                                         |
|-----------------------------|---------|-----------------------------------|---------------|---------------------------------------------------|
| <i>Lessonia trabeculata</i> | Peru    | <i>Patiria chilensis</i>          | Echinodermata | Carbajal et al. (2021)                            |
| <i>Lessonia trabeculata</i> | Chile   | <i>Sunamphitoe femorata</i>       | Arthropoda    | Thiel and Vásquez (2000)                          |
| <i>Lessonia trabeculata</i> | Peru    | <i>Allopetrolisthes angulosus</i> | Arthropoda    | Carbajal et al. (2021)                            |
| <i>Lessonia trabeculata</i> | Peru    | <i>Petrolisthes desmarestii</i>   | Arthropoda    | Carbajal et al. (2021)                            |
| <i>Lessonia trabeculata</i> | Chile   | <i>Phalerisida maculata</i>       | Arthropoda    | González et al. (2014)                            |
| <i>Lessonia trabeculata</i> | Peru    | <i>Phragmatopoma moerchi</i>      | Annelida      | Carbajal et al. (2021)                            |
| <i>Lessonia trabeculata</i> | Chile   | <i>Phragmatopoma moerchi</i>      | Annelida      | Gelcich et al. (2008)                             |
| <i>Lessonia trabeculata</i> | Peru    | <i>Phyllodoce</i> sp.             | Annelida      | Carbajal et al. (2021)                            |
| <i>Lessonia trabeculata</i> | Peru    | Phyllodocidae no det. 3           | Annelida      | Carbajal et al. (2021)                            |
| <i>Lessonia trabeculata</i> | Peru    | <i>Pilumnoides perlatus</i>       | Arthropoda    | Carbajal et al. (2021)                            |
| <i>Lessonia trabeculata</i> | Chile   | <i>Pinguipes chilensis</i>        | Chordata      | Angel and Ojeda (2001); Pérez-Matus et al. (2007) |
| <i>Lessonia trabeculata</i> | Peru    | Pinnotheridae no det.             | Arthropoda    | Carbajal et al. (2021)                            |
| <i>Lessonia trabeculata</i> | Peru    | Pisionidae no det.                | Annelida      | Carbajal et al. (2021)                            |
| <i>Lessonia trabeculata</i> | Peru    | <i>Pisoides edwardsii</i>         | Arthropoda    | Carbajal et al. (2021)                            |
| <i>Lessonia trabeculata</i> | Chile   | <i>Pisoides edwardsii</i>         | Arthropoda    | Carrasco et al. (2017)                            |
| <i>Lessonia trabeculata</i> | Chile   | <i>Pyura chilensis</i>            | Chordata      | Villegas et al. (2008); Gelcich et al. (2008)     |
| <i>Lessonia trabeculata</i> | Chile   | <i>Plocamium cartilagineum</i>    | Rhodophyta    | Gelcich et al. (2008)                             |
| <i>Lessonia trabeculata</i> | Peru    | Polynoidae no det.                | Annelida      | Carbajal et al. (2021)                            |
| <i>Lessonia trabeculata</i> | Peru    | Porcellanidae no det.             | Arthropoda    | Carbajal et al. (2021)                            |
| <i>Lessonia trabeculata</i> | Peru    | Porifera no det.                  | Porifera      | Carbajal et al. (2021)                            |
| <i>Lessonia trabeculata</i> | Chile   | Porifera no det.                  | Porifera      | Gelcich et al. (2008)                             |

| KELP                        | COUNTRY | TAXA                              | PHYLUM     | REFERENCE                                         |
|-----------------------------|---------|-----------------------------------|------------|---------------------------------------------------|
| <i>Lessonia trabeculata</i> | Peru    | <i>Priene scabrum</i>             | Mollusca   | Carbajal et al. (2021)                            |
| <i>Lessonia trabeculata</i> | Chile   | <i>Priene scabrum</i>             | Mollusca   | Villegas et al. (2008)                            |
| <i>Lessonia trabeculata</i> | Peru    | <i>Priene scabrum</i>             | Mollusca   | Carbajal et al. (2021)                            |
| <i>Lessonia trabeculata</i> | Peru    | <i>Prionospio</i> sp.             | Annelida   | Carbajal et al. (2021)                            |
| <i>Lessonia trabeculata</i> | Peru    | <i>Prisogaster niger</i>          | Mollusca   | Carbajal et al. (2021)                            |
| <i>Lessonia trabeculata</i> | Chile   | <i>Prolatilus jugularis</i>       | Chordata   | Angel and Ojeda (2001); Pérez-Matus et al. (2007) |
| <i>Lessonia trabeculata</i> | Chile   | <i>Symphyocladia dendroidea</i>   | Rhodophyta | Gelcich et al. (2008)                             |
| <i>Lessonia trabeculata</i> | Peru    | Pycnogonida no det.               | Arthropoda | Carbajal et al. (2021)                            |
| <i>Lessonia trabeculata</i> | Peru    | <i>Pyura chilensis</i>            | Chordata   | Carbajal et al. (2021)                            |
| <i>Lessonia trabeculata</i> | Chile   | <i>Ralfsia confusa</i>            | Ochrophyta | Gelcich et al. (2008)                             |
| <i>Lessonia trabeculata</i> | Chile   | <i>Rhodymenia</i> spp.            | Rhodophyta | Vega et al. (2005)                                |
| <i>Lessonia trabeculata</i> | Peru    | <i>Rhynchocinetes typus</i>       | Arthropoda | Carbajal et al. (2021)                            |
| <i>Lessonia trabeculata</i> | Chile   | <i>Rhynchocinetes typus</i>       | Arthropoda | Carrasco et al. (2017)                            |
| <i>Lessonia trabeculata</i> | Peru    | <i>Rissoina inca</i>              | Mollusca   | Carbajal et al. (2021)                            |
| <i>Lessonia trabeculata</i> | Chile   | <i>Romaleon setosum</i>           | Arthropoda | Carrasco et al. (2017)                            |
| <i>Lessonia trabeculata</i> | Peru    | Sabellidae no det.                | Annelida   | Carbajal et al. (2021)                            |
| <i>Lessonia trabeculata</i> | Chile   | <i>Sardinops sagax</i>            | Chordata   | Angel and Ojeda (2001)                            |
| <i>Lessonia trabeculata</i> | Chile   | <i>Scartichthys gigas</i>         | Chordata   | Angel and Ojeda (2001)                            |
| <i>Lessonia trabeculata</i> | Chile   | <i>Scartichthys viridis</i>       | Chordata   | Angel and Ojeda (2001)                            |
| <i>Lessonia trabeculata</i> | Chile   | <i>Schottera nicaeensis</i>       | Rhodophyta | Gelcich et al. (2008)                             |
| <i>Lessonia trabeculata</i> | Peru    | <i>Schroederichthys chilensis</i> | Chordata   | Flores and Adams (2014)                           |

| KELP                        | COUNTRY | TAXA                              | PHYLUM        | REFERENCE                                         |
|-----------------------------|---------|-----------------------------------|---------------|---------------------------------------------------|
| <i>Lessonia trabeculata</i> | Chile   | <i>Schroederichthys chilensis</i> | Chordata      | Angel and Ojeda (2001); Trujillo et al. (2019)    |
| <i>Lessonia trabeculata</i> | Chile   | <i>Cheilotrema fasciatum</i>      | Chordata      | Angel and Ojeda (2001); Pérez-Matus et al. (2007) |
| <i>Lessonia trabeculata</i> | Chile   | <i>Scomberomorus maculatus</i>    | Chordata      | Angel and Ojeda (2001)                            |
| <i>Lessonia trabeculata</i> | Chile   | <i>Sebastes capensis</i>          | Chordata      | Pérez-Matus et al. (2007)                         |
| <i>Lessonia trabeculata</i> | Peru    | <i>Semele</i> sp.                 | Mollusca      | Carbajal et al. (2021)                            |
| <i>Lessonia trabeculata</i> | Chile   | <i>Semicossyphus darwini</i>      | Chordata      | Pérez-Matus et al. (2007)                         |
| <i>Lessonia trabeculata</i> | Peru    | <i>Semimytilus patagonicus</i>    | Mollusca      | Carbajal et al. (2021)                            |
| <i>Lessonia trabeculata</i> | Chile   | <i>Seriolella violacea</i>        | Chordata      | Angel and Ojeda (2001)                            |
| <i>Lessonia trabeculata</i> | Chile   | <i>Stellifer minor</i>            | Chordata      | Angel and Ojeda (2001)                            |
| <i>Lessonia trabeculata</i> | Chile   | <i>Stichaster striatus</i>        | Echinodermata | Gelcich et al. (2008); Villegas et al. (2008)     |
| <i>Lessonia trabeculata</i> | Chile   | <i>Sunamphitoe lessoniophila</i>  | Arthropoda    | Pérez-Schultheiss (2018)                          |
| <i>Lessonia trabeculata</i> | Peru    | Syllidae no det.                  | Annelida      | Carbajal et al. (2021)                            |
| <i>Lessonia trabeculata</i> | Peru    | <i>Syllis</i> sp. 2               | Annelida      | Carbajal et al. (2021)                            |
| <i>Lessonia trabeculata</i> | Peru    | <i>Syllis</i> sp. 3               | Annelida      | Carbajal et al. (2021)                            |
| <i>Lessonia trabeculata</i> | Peru    | <i>Synalpheus spinifrons</i>      | Arthropoda    | Carbajal et al. (2021)                            |
| <i>Lessonia trabeculata</i> | Peru    | <i>Taliepus dentatus</i>          | Arthropoda    | Carbajal et al. (2021)                            |
| <i>Lessonia trabeculata</i> | Chile   | <i>Taliepus dentatus</i>          | Arthropoda    | Villegas et al. (2008)                            |
| <i>Lessonia trabeculata</i> | Chile   | <i>Taliepus marginatus</i>        | Arthropoda    | Jofre et al. (2013)                               |
| <i>Lessonia trabeculata</i> | Chile   | <i>Taliepus</i> spp.              | Arthropoda    | Carrasco et al. (2017)                            |
| <i>Lessonia trabeculata</i> | Peru    | Tanaidacea no det. 4              | Arthropoda    | Carbajal et al. (2021)                            |
| <i>Lessonia trabeculata</i> | Peru    | <i>Tegula atra</i>                | Mollusca      | Carbajal et al. (2021)                            |

| KELP                        | COUNTRY | TAXA                           | PHYLUM        | REFERENCE                                                                                          |
|-----------------------------|---------|--------------------------------|---------------|----------------------------------------------------------------------------------------------------|
| <i>Lessonia trabeculata</i> | Chile   | <i>Tegula atra</i>             | Mollusca      | Villegas et al. (2008)                                                                             |
| <i>Lessonia trabeculata</i> | Peru    | <i>Tegula luctuosa</i>         | Mollusca      | Carbajal et al. (2021)                                                                             |
| <i>Lessonia trabeculata</i> | Peru    | <i>Tegula quadricostata</i>    | Mollusca      | Carbajal et al. (2021)                                                                             |
| <i>Lessonia trabeculata</i> | Peru    | <i>Tegula tridentata</i>       | Mollusca      | Carbajal et al. (2021)                                                                             |
| <i>Lessonia trabeculata</i> | Chile   | <i>Tegula tridentata</i>       | Mollusca      | Villegas et al. (2008)                                                                             |
| <i>Lessonia trabeculata</i> | Peru    | Terebellidae no det.           | Annelida      | Carbajal et al. (2021)                                                                             |
| <i>Lessonia trabeculata</i> | Chile   | Terebellidae no det.           | Annelida      | Gelcich et al. (2008)                                                                              |
| <i>Lessonia trabeculata</i> | Peru    | <i>Tetrapygyus niger</i>       | Echinodermata | Carbajal et al. (2021)                                                                             |
| <i>Lessonia trabeculata</i> | Chile   | <i>Tetrapygyus niger</i>       | Echinodermata | Rodríguez and Ojeda (1993); Gelcich et al. (2008); Villegas et al. (2008); Perreault et al. (2014) |
| <i>Lessonia trabeculata</i> | Chile   | <i>Thaisella chocolata</i>     | Mollusca      | Villegas et al. (2008)                                                                             |
| <i>Lessonia trabeculata</i> | Chile   | <i>Thyrsites atun</i>          | Chordata      | Angel and Ojeda (2001)                                                                             |
| <i>Lessonia trabeculata</i> | Peru    | <i>Tonicia chilensis</i>       | Mollusca      | Carbajal et al. (2021)                                                                             |
| <i>Lessonia trabeculata</i> | Chile   | <i>Trachurus murphyi</i>       | Chordata      | Angel and Ojeda (2001)                                                                             |
| <i>Lessonia trabeculata</i> | Peru    | <i>Tricolia</i> sp.            | Mollusca      | Carbajal et al. (2021)                                                                             |
| <i>Lessonia trabeculata</i> | Chile   | <i>Eulithidium umbilicatum</i> | Mollusca      | Carrasco et al. (2017)                                                                             |
| <i>Lessonia trabeculata</i> | Peru    | <i>Trochita trochiformis</i>   | Mollusca      | Carbajal et al. (2021)                                                                             |
| <i>Lessonia trabeculata</i> | Peru    | Tunicata no det.               | Chordata      | Carbajal et al. (2021)                                                                             |
| <i>Lessonia trabeculata</i> | Peru    | <i>Typosyllis</i> sp.          | Annelida      | Carbajal et al. (2021)                                                                             |
| <i>Lessonia trabeculata</i> | Chile   | <i>Ulva</i> spp.               | Chlorophyta   | Gelcich et al. (2008)                                                                              |
| <i>Lessonia trabeculata</i> | Chile   | <i>Ventojassa frequens</i>     | Arthropoda    | Thiel and Vásquez (2000)                                                                           |



| KELP                        | COUNTRY | TAXA                              | PHYLUM        | REFERENCE                                         |
|-----------------------------|---------|-----------------------------------|---------------|---------------------------------------------------|
| <i>Lessonia trabeculata</i> | Peru    | Xanthidae no det.                 | Arthropoda    | Carbajal et al. (2021)                            |
| <i>Lessonia trabeculata</i> | Peru    | <i>Xanthochorus buxeus</i>        | Mollusca      | Carbajal et al. (2021)                            |
| <i>Macrocystis pyrifera</i> | Chile   | <i>Acanthistius pictus</i>        | Chordata      | Angel and Ojeda (2001); Pérez-Matus et al. (2007) |
| <i>Macrocystis pyrifera</i> | Peru    | Actiniaria no det. 1              | Cnidaria      | Carbajal et al. (2021)                            |
| <i>Macrocystis pyrifera</i> | Peru    | <i>Alpheus inca</i>               | Arthropoda    | Carbajal et al. (2021)                            |
| <i>Macrocystis pyrifera</i> | Peru    | Amphipoda no det.                 | Arthropoda    | Carbajal et al. (2021)                            |
| <i>Macrocystis pyrifera</i> | Chile   | Amphoroidea typa                  | Arthropoda    | Hinojosa et al. (2010); Winkler et al. (2017)     |
| <i>Macrocystis pyrifera</i> | Chile   | <i>Anisotremus scapularis</i>     | Chordata      | Angel and Ojeda (2001); Pérez-Matus et al. (2007) |
| <i>Macrocystis pyrifera</i> | Chile   | <i>Anthothoe chilensis</i>        | Cnidaria      | Villegas et al. (2008)                            |
| <i>Macrocystis pyrifera</i> | Chile   | <i>Aora typica</i>                | Arthropoda    | Winkler et al. (2017)                             |
| <i>Macrocystis pyrifera</i> | Chile   | <i>Aphos porosus</i>              | Chordata      | Angel and Ojeda (2001)                            |
| <i>Macrocystis pyrifera</i> | Chile   | <i>Aplodactylus punctatus</i>     | Chordata      | Angel and Ojeda (2001); Pérez-Matus et al. (2007) |
| <i>Macrocystis pyrifera</i> | Peru    | <i>Arbacia spatuligera</i>        | Echinodermata | Carbajal et al. (2021)                            |
| <i>Macrocystis pyrifera</i> | Chile   | <i>Asparagopsis armata</i>        | Rhodophyta    | Vega et al. (2005)                                |
| <i>Macrocystis pyrifera</i> | Chile   | <i>Auchenionchus microcirrhis</i> | Chordata      | Angel and Ojeda (2001)                            |
| <i>Macrocystis pyrifera</i> | Chile   | <i>Aulacomya atra</i>             | Mollusca      | Villegas et al. (2008)                            |
| <i>Macrocystis pyrifera</i> | Peru    | <i>Balanus laevis</i>             | Arthropoda    | Carbajal et al. (2021)                            |
| <i>Macrocystis pyrifera</i> | Chile   | <i>Bircenna fulva</i>             | Arthropoda    | Hinojosa et al. (2010); Winkler et al. (2017)     |
| <i>Macrocystis pyrifera</i> | Peru    | Bivalvia no det. 2                | Mollusca      | Carbajal et al. (2021)                            |
| <i>Macrocystis pyrifera</i> | Peru    | <i>Brachidontes granulatus</i>    | Mollusca      | Carbajal et al. (2021)                            |

| KELP                        | COUNTRY | TAXA                              | PHYLUM         | REFERENCE               |
|-----------------------------|---------|-----------------------------------|----------------|-------------------------|
| <i>Macrocystis pyrifera</i> | Peru    | Brachyura no det. 1               | Arthropoda     | Carbajal et al. (2021)  |
| <i>Macrocystis pyrifera</i> | Chile   | Brachyura no det. 2               | Arthropoda     | Hinojosa et al. (2010)  |
| <i>Macrocystis pyrifera</i> | Peru    | Bryozoa no det.                   | Bryozoa        | Carbajal et al. (2021)  |
| <i>Macrocystis pyrifera</i> | Peru    | <i>Caenocentrotus gibbosus</i>    | Echinodermata  | Carbajal et al. (2021)  |
| <i>Macrocystis pyrifera</i> | Chile   | <i>Callorhinchus callorynchus</i> | Chordata       | Angel and Ojeda (2001 ) |
| <i>Macrocystis pyrifera</i> | Chile   | <i>Cancer plebejus</i>            | Arthropoda     | Villegas et al. (2008)  |
| <i>Macrocystis pyrifera</i> | Chile   | <i>Pseudograpsus setosus</i>      | Arthropoda     | Villegas et al. (2008)  |
| <i>Macrocystis pyrifera</i> | Peru    | Cancridae no det.                 | Arthropoda     | Carbajal et al. (2021)  |
| <i>Macrocystis pyrifera</i> | Peru    | Capitellidae no det.              | Annelida       | Carbajal et al. (2021)  |
| <i>Macrocystis pyrifera</i> | Chile   | Caprelidae                        | Arthropoda     | Hinojosa et al. (2010)  |
| <i>Macrocystis pyrifera</i> | Peru    | <i>Caprella</i> sp.1              | Arthropoda     | Carbajal et al. (2021)  |
| <i>Macrocystis pyrifera</i> | Chile   | <i>Cheilodactylus variegatus</i>  | Chordata       | Campos et al. (2020)    |
| <i>Macrocystis pyrifera</i> | Peru    | <i>Chiton cumingsii</i>           | Mollusca       | Carbajal et al. (2021)  |
| <i>Macrocystis pyrifera</i> | Chile   | <i>Chiton granosus</i>            | Mollusca       | Villegas et al. (2008)  |
| <i>Macrocystis pyrifera</i> | Peru    | Chitonidae no det.                | Mollusca       | Carbajal et al. (2021)  |
| <i>Macrocystis pyrifera</i> | Chile   | <i>Mazzaella canaliculata</i>     | Rhodophyta     | Vega et al. (2005)      |
| <i>Macrocystis pyrifera</i> | Peru    | <i>Chone</i> sp.                  | Annelida       | Carbajal et al. (2021)  |
| <i>Macrocystis pyrifera</i> | Chile   | <i>Chromis crusma</i>             | Chordata       | Angel and Ojeda (2001)  |
| <i>Macrocystis pyrifera</i> | Chile   | <i>Chrysaora plocamia</i>         | Cnidaria       | Ceh and Riascos (2017)  |
| <i>Macrocystis pyrifera</i> | Peru    | Chrysopetallidae no det.          | Annelida       | Carbajal et al. (2021)  |
| <i>Macrocystis pyrifera</i> | Chile   | <i>Cilus gilberti</i>             | Chordata       | Angel and Ojeda (2001)  |
| <i>Macrocystis pyrifera</i> | Chile   | <i>Citromicrobium</i>             | Proteobacteria | Florez et al. (2019)    |

| KELP                        | COUNTRY | TAXA                             | PHYLUM        | REFERENCE                |
|-----------------------------|---------|----------------------------------|---------------|--------------------------|
| <i>Macrocystis pyrifera</i> | Chile   | <i>Concholepas concholepas</i>   | Mollusca      | Villegas et al. (2008)   |
| <i>Macrocystis pyrifera</i> | Peru    | Corophiidae no det.              | Arthropoda    | Carbajal et al. (2021)   |
| <i>Macrocystis pyrifera</i> | Peru    | <i>Crassilabrum crassilabrum</i> | Mollusca      | Carbajal et al. (2021)   |
| <i>Macrocystis pyrifera</i> | Chile   | <i>Crassilabrum crassilabrum</i> | Mollusca      | Villegas et al. (2008)   |
| <i>Macrocystis pyrifera</i> | Peru    | <i>Crepidatella peruviana</i>    | Mollusca      | Carbajal et al. (2021)   |
| <i>Macrocystis pyrifera</i> | Chile   | Cyanobacterium                   | Cyanophyta    | Florez et al. (2019)     |
| <i>Macrocystis pyrifera</i> | Peru    | <i>Diopatra chiliensis</i>       | Annelida      | Carbajal et al. (2021)   |
| <i>Macrocystis pyrifera</i> | Peru    | <i>Dipolydora socialis</i>       | Annelida      | Carbajal et al. (2021)   |
| <i>Macrocystis pyrifera</i> | Peru    | <i>Discinisca lamellosa</i>      | Brachiopoda   | Carbajal et al. (2021)   |
| <i>Macrocystis pyrifera</i> | Peru    | <i>Dodecaceria</i> sp.           | Annelida      | Carbajal et al. (2021)   |
| <i>Macrocystis pyrifera</i> | Peru    | Dorvilleidae no det.             | Annelida      | Carbajal et al. (2021)   |
| <i>Macrocystis pyrifera</i> | Peru    | Echinacea no det.                | Echinodermata | Carbajal et al. (2021)   |
| <i>Macrocystis pyrifera</i> | Peru    | <i>Elasmopus</i> sp. 1           | Arthropoda    | Carbajal et al. (2021)   |
| <i>Macrocystis pyrifera</i> | Chile   | <i>Elasmopus</i> sp. 2           | Arthropoda    | Carrasco et al. (2017)   |
| <i>Macrocystis pyrifera</i> | Chile   | <i>Erichthonius brasiliensis</i> | Arthropoda    | Thiel and Vásquez (2000) |
| <i>Macrocystis pyrifera</i> | Peru    | <i>Erichthonius punctatus</i>    | Arthropoda    | Carbajal et al. (2021)   |
| <i>Macrocystis pyrifera</i> | Peru    | <i>Eulalia</i> sp.               | Annelida      | Carbajal et al. (2021)   |
| <i>Macrocystis pyrifera</i> | Peru    | <i>Eurypanopeus transversus</i>  | Arthropoda    | Carbajal et al. (2021)   |
| <i>Macrocystis pyrifera</i> | Chile   | <i>Fissurella latimarginata</i>  | Mollusca      | Villegas et al. (2008)   |
| <i>Macrocystis pyrifera</i> | Chile   | <i>Fissurella cumingi</i>        | Mollusca      | Villegas et al. (2008)   |
| <i>Macrocystis pyrifera</i> | Peru    | <i>Fissurella peruviana</i>      | Mollusca      | Carbajal et al. (2021)   |
| <i>Macrocystis pyrifera</i> | Peru    | <i>Fissurella</i> sp.            | Mollusca      | Carbajal et al. (2021)   |

| KELP                        | COUNTRY | TAXA                               | PHYLUM        | REFERENCE                                         |
|-----------------------------|---------|------------------------------------|---------------|---------------------------------------------------|
| <i>Macrocystis pyrifera</i> | Peru    | Gammaridea no det.                 | Arthropoda    | Carbajal et al. (2021)                            |
| <i>Macrocystis pyrifera</i> | Chile   | Gammaropsis typica                 | Arthropoda    | Thiel and Vásquez (2000)                          |
| <i>Macrocystis pyrifera</i> | Peru    | Gasteropoda no det. 3              | Mollusca      | Carbajal et al. (2021)                            |
| <i>Macrocystis pyrifera</i> | Chile   | <i>Genypterus chilensis</i>        | Chordata      | Pérez-Matus et al. (2007)                         |
| <i>Macrocystis pyrifera</i> | Chile   | <i>Girella laevisfrons</i>         | Chordata      | Angel and Ojeda (2001); Pérez-Matus et al. (2007) |
| <i>Macrocystis pyrifera</i> | Chile   | <i>Dictyota kunthii</i>            | Ochrophyta    | Vega et al. (2005)                                |
| <i>Macrocystis pyrifera</i> | Peru    | <i>Glycera</i> sp.                 | Annelida      | Carbajal et al. (2021)                            |
| <i>Macrocystis pyrifera</i> | Chile   | <i>Gondogeneia</i> sp.             | Arthropoda    | Hinojosa et al. (2010)                            |
| <i>Macrocystis pyrifera</i> | Peru    | Goniadidae no det.                 | Annelida      | Carbajal et al. (2021)                            |
| <i>Macrocystis pyrifera</i> | Chile   | <i>Gracilaria</i> sp.              | Rhodophyta    | Campos et al. (2020)                              |
| <i>Macrocystis pyrifera</i> | Chile   | <i>Graus nigra</i>                 | Chordata      | Pérez-Matus et al. (2007)                         |
| <i>Macrocystis pyrifera</i> | Chile   | <i>Halicarcinus planatus</i>       | Arthropoda    | Hinojosa et al. (2010)                            |
| <i>Macrocystis pyrifera</i> | Chile   | <i>Halopteris</i> spp.             | Ochrophyta    | Vega et al. (2005)                                |
| <i>Macrocystis pyrifera</i> | Peru    | <i>Halosydna johnsoni</i>          | Annelida      | Carbajal et al. (2021)                            |
| <i>Macrocystis pyrifera</i> | Peru    | <i>Harmothoe</i> sp.               | Annelida      | Carbajal et al. (2021)                            |
| <i>Macrocystis pyrifera</i> | Chile   | <i>Heliaster helianthus</i>        | Echinodermata | Villegas et al. (2008)                            |
| <i>Macrocystis pyrifera</i> | Chile   | <i>Hemigrapsus crenulatus</i>      | Arthropoda    | Hinojosa et al. (2010)                            |
| <i>Macrocystis pyrifera</i> | Chile   | <i>Hemilutjanus macrophthalmos</i> | Chordata      | Angel and Ojeda (2001); Pérez-Matus et al. (2007) |
| <i>Macrocystis pyrifera</i> | Peru    | <i>Hiatella arctica</i>            | Mollusca      | Carbajal et al. (2021)                            |
| <i>Macrocystis pyrifera</i> | Chile   | <i>Hippoglossina macrops</i>       | Chordata      | Angel and Ojeda (2001)                            |
| <i>Macrocystis pyrifera</i> | Chile   | <i>Hyale</i> sp.                   | Arthropoda    | Winkler et al. (2017)                             |

| KELP                        | COUNTRY | TAXA                           | PHYLUM        | REFERENCE                                                                          |
|-----------------------------|---------|--------------------------------|---------------|------------------------------------------------------------------------------------|
| <i>Macrocystis pyrifera</i> | Peru    | Hydrozoa no det.               | Cnidaria      | Carbajal et al. (2021)                                                             |
| <i>Macrocystis pyrifera</i> | Chile   | <i>Ianiropsis</i> sp.          | Arthropoda    | Winkler et al. (2017)                                                              |
| <i>Macrocystis pyrifera</i> | Chile   | <i>Isacia conceptionis</i>     | Chordata      | Carrasco et al. (2017)                                                             |
| <i>Macrocystis pyrifera</i> | Chile   | <i>Ischyroceridae</i>          | Arthropoda    | Hinojosa et al. (2010)                                                             |
| <i>Macrocystis pyrifera</i> | Chile   | <i>Labrisomus philippii</i>    | Chordata      | Angel and Ojeda (2001); Pérez-Matus et al. (2007)                                  |
| <i>Macrocystis pyrifera</i> | Chile   | <i>Larus dominicanus</i>       | Chordata      | Hockey (1988)                                                                      |
| <i>Macrocystis pyrifera</i> | Peru    | <i>Lepidonotus</i> sp.         | Annelida      | Carbajal et al. (2021)                                                             |
| <i>Macrocystis pyrifera</i> | Chile   | <i>Limnoria chilensis</i>      | Arthropoda    | Hinojosa et al. (2010)                                                             |
| <i>Macrocystis pyrifera</i> | Chile   | <i>Limnoria quadripunctata</i> | Arthropoda    | Winkler et al. (2017)                                                              |
| <i>Macrocystis pyrifera</i> | Chile   | <i>Limnoria</i> spp.           | Arthropoda    | Miranda and Thiel (2008)                                                           |
| <i>Macrocystis pyrifera</i> | Peru    | <i>Liopetrolisthes mitra</i>   | Arthropoda    | Carbajal et al. (2021)                                                             |
| <i>Macrocystis pyrifera</i> | Chile   | <i>Liopetrolisthes</i> sp.     | Arthropoda    | Hinojosa et al. (2010)                                                             |
| <i>Macrocystis pyrifera</i> | Chile   | <i>Lithodes santolla</i>       | Arthropoda    | Cárdenas et al. (2007)                                                             |
| <i>Macrocystis pyrifera</i> | Chile   | <i>Loxechinus albus</i>        | Echinodermata | Vásquez (2007); Villegas et al. (2008); González et al. (2008); Vega et al. (2005) |
| <i>Macrocystis pyrifera</i> | Chile   | <i>Luidia magellanica</i>      | Echinodermata | Villegas et al. (2008)                                                             |
| <i>Macrocystis pyrifera</i> | Peru    | <i>Lumbrineris</i> sp.         | Annelida      | Carbajal et al. (2021)                                                             |
| <i>Macrocystis pyrifera</i> | Chile   | <i>Lutra felina</i>            | Chordata      | Medina-Vogel et al. (2004)                                                         |
| <i>Macrocystis pyrifera</i> | Chile   | <i>Quadrimaera incerta</i>     | Arthropoda    | Thiel and Vásquez (2000)                                                           |
| <i>Macrocystis pyrifera</i> | Chile   | <i>Medialuna ancietae</i>      | Chordata      | Pérez-Matus et al. (2007)                                                          |
| <i>Macrocystis pyrifera</i> | Peru    | <i>Acromegalomma modestum</i>  | Annelida      | Carbajal et al. (2021)                                                             |

| KELP                        | COUNTRY | TAXA                             | PHYLUM        | REFERENCE                                         |
|-----------------------------|---------|----------------------------------|---------------|---------------------------------------------------|
| <i>Macrocystis pyrifera</i> | Peru    | <i>Membranipora</i> sp.          | Bryozoa       | Carbajal et al. (2021)                            |
| <i>Macrocystis pyrifera</i> | Chile   | <i>Menticirrhus ophicephalus</i> | Chordata      | Angel and Ojeda (2001)                            |
| <i>Macrocystis pyrifera</i> | Peru    | <i>Alia unifasciata</i>          | Mollusca      | Carbajal et al. (2021)                            |
| <i>Macrocystis pyrifera</i> | Chile   | <i>Mugil cephalus</i>            | Chordata      | Gelcich et al. (2008)                             |
| <i>Macrocystis pyrifera</i> | Peru    | Muricidae no det.                | Mollusca      | Carbajal et al. (2021)                            |
| <i>Macrocystis pyrifera</i> | Chile   | <i>Mustelus whitneyi</i>         | Chordata      | Angel and Ojeda (2001)                            |
| <i>Macrocystis pyrifera</i> | Chile   | <i>Myxodes viridis</i>           | Chordata      | Ruz et al. (2021)                                 |
| <i>Macrocystis pyrifera</i> | Peru    | <i>Naineris</i> sp.              | Annelida      | Carbajal et al. (2021)                            |
| <i>Macrocystis pyrifera</i> | Peru    | <i>Nassarius dentifer</i>        | Mollusca      | Carbajal et al. (2021)                            |
| <i>Macrocystis pyrifera</i> | Peru    | <i>Nassarius gayi</i>            | Mollusca      | Carbajal et al. (2021)                            |
| <i>Macrocystis pyrifera</i> | Peru    | Nemertea no det.                 | Nemertea      | Carbajal et al. (2021)                            |
| <i>Macrocystis pyrifera</i> | Peru    | <i>Nereis callaona</i>           | Annelida      | Carbajal et al. (2021)                            |
| <i>Macrocystis pyrifera</i> | Chile   | <i>Nexilosus latifrons</i>       | Chordata      | Angel and Ojeda (2001); Pérez-Matus et al. (2007) |
| <i>Macrocystis pyrifera</i> | Peru    | <i>Notaulax</i> sp.              | Annelida      | Carbajal et al. (2021)                            |
| <i>Macrocystis pyrifera</i> | Peru    | Nudibranchia no det.             | Mollusca      | Carbajal et al. (2021)                            |
| <i>Macrocystis pyrifera</i> | Chile   | <i>Obelia geniculata</i>         | Cnidaria      | Orejas et al. (2000)                              |
| <i>Macrocystis pyrifera</i> | Peru    | <i>Eusyllis liniata</i>          | Annelida      | Carbajal et al. (2021)                            |
| <i>Macrocystis pyrifera</i> | Peru    | <i>Odontosyllis</i> sp.          | Annelida      | Carbajal et al. (2021)                            |
| <i>Macrocystis pyrifera</i> | Peru    | <i>Odostomia</i> sp.             | Mollusca      | Carbajal et al. (2021)                            |
| <i>Macrocystis pyrifera</i> | Peru    | <i>Ophiactis kroeyeri</i>        | Echinodermata | Carbajal et al. (2021)                            |
| <i>Macrocystis pyrifera</i> | Chile   | <i>Oplegnathus insignis</i>      | Chordata      | Pérez-Matus et al. (2007)                         |
| <i>Macrocystis pyrifera</i> | Chile   | <i>Orchestoidea tuberculata</i>  | Arthropoda    | Jaramillo et al. (2006); Duarte et                |

| KELP                        | COUNTRY | TAXA                            | PHYLUM     | REFERENCE                                                                                                                                   |
|-----------------------------|---------|---------------------------------|------------|---------------------------------------------------------------------------------------------------------------------------------------------|
|                             |         |                                 |            | al. (2008); Duarte et al. (2009); Duarte et al. (2014)                                                                                      |
| <i>Macrocystis pyrifera</i> | Peru    | <i>Oxydromus</i> sp.            | Annelida   | Carbajal et al. (2021)                                                                                                                      |
| <i>Macrocystis pyrifera</i> | Peru    | <i>Pachycheles crinimanus</i>   | Arthropoda | Carbajal et al. (2021)                                                                                                                      |
| <i>Macrocystis pyrifera</i> | Peru    | Paguridae no det.               | Arthropoda | Carbajal et al. (2021)                                                                                                                      |
| <i>Macrocystis pyrifera</i> | Chile   | <i>Pagurus</i> sp.              | Arthropoda | Winkler et al. (2017)                                                                                                                       |
| <i>Macrocystis pyrifera</i> | Peru    | <i>Pagurus villosus</i>         | Arthropoda | Carbajal et al. (2021)                                                                                                                      |
| <i>Macrocystis pyrifera</i> | Chile   | <i>Parhyalella penai</i>        | Arthropoda | Winkler et al. (2017)                                                                                                                       |
| <i>Macrocystis pyrifera</i> | Chile   | <i>Paralabrax humeralis</i>     | Chordata   | Angel and Ojeda (2001); Pérez-Matus et al. (2007)                                                                                           |
| <i>Macrocystis pyrifera</i> | Chile   | <i>Paralichthys microps</i>     | Chordata   | Angel and Ojeda (2001); Pérez-Matus et al. (2007)                                                                                           |
| <i>Macrocystis pyrifera</i> | Chile   | <i>Paramoera</i> sp.            | Arthropoda | Hinojosa et al. (2010); Winkler et al. (2017)                                                                                               |
| <i>Macrocystis pyrifera</i> | Chile   | <i>Paranthura porteri</i>       | Arthropoda | Winkler et al. (2017)                                                                                                                       |
| <i>Macrocystis pyrifera</i> | Chile   | <i>Paraxanthus barbiger</i>     | Arthropoda | Villegas et al. (2008)                                                                                                                      |
| <i>Macrocystis pyrifera</i> | Chile   | <i>Parhyalella penai</i>        | Arthropoda | Pérez-Schultheiss and Crespo (2008)                                                                                                         |
| <i>Macrocystis pyrifera</i> | Chile   | <i>Patella</i> sp.              | Mollusca   | Winkler et al. (2017)                                                                                                                       |
| <i>Macrocystis pyrifera</i> | Chile   | <i>Sunamphitoe femorata</i>     | Arthropoda | Thiel and Vásquez (2000); Cerda et al. (2010); Hinojosa et al. (2010); Winkler et al. (2017); Rothäusler et al. (2018); Gutow et al. (2020) |
| <i>Macrocystis pyrifera</i> | Peru    | <i>Petricola</i> sp.            | Mollusca   | Carbajal et al. (2021)                                                                                                                      |
| <i>Macrocystis pyrifera</i> | Peru    | <i>Petrolisthes desmarestii</i> | Arthropoda | Carbajal et al. (2021)                                                                                                                      |

| KELP                        | COUNTRY | TAXA                           | PHYLUM         | REFERENCE                                                               |
|-----------------------------|---------|--------------------------------|----------------|-------------------------------------------------------------------------|
| <i>Macrocystis pyrifera</i> | Chile   | <i>Petrolisthes laevigatus</i> | Arthropoda     | Hinojosa et al. (2010)                                                  |
| <i>Macrocystis pyrifera</i> | Chile   | <i>Phalerisida maculata</i>    | Arthropoda     | González et al. (2014)                                                  |
| <i>Macrocystis pyrifera</i> | Peru    | <i>Pherusa</i> sp.             | Annelida       | Carbajal et al. (2021)                                                  |
| <i>Macrocystis pyrifera</i> | Peru    | <i>Phragmatopoma moerchi</i>   | Annelida       | Carbajal et al. (2021)                                                  |
| <i>Macrocystis pyrifera</i> | Peru    | Phyllodocidae no det. 2        | Annelida       | Carbajal et al. (2021)                                                  |
| <i>Macrocystis pyrifera</i> | Peru    | <i>Pilumnoides perlatus</i>    | Arthropoda     | Carbajal et al. (2021)                                                  |
| <i>Macrocystis pyrifera</i> | Chile   | <i>Pinguipes chilensis</i>     | Chordata       | Angel and Ojeda (2001); Pérez-Matus et al. (2007); Campos et al. (2020) |
| <i>Macrocystis pyrifera</i> | Peru    | <i>Pinnaxodes chilensis</i>    | Arthropoda     | Carbajal et al. (2021)                                                  |
| <i>Macrocystis pyrifera</i> | Chile   | <i>Pyura chilensis</i>         | Chordata       | Villegas et al. (2008)                                                  |
| <i>Macrocystis pyrifera</i> | Peru    | Polycladida no det.            | Platelminta    | Carbajal et al. (2021)                                                  |
| <i>Macrocystis pyrifera</i> | Peru    | <i>Polydora</i> sp.            | Magnoliophyta  | Carbajal et al. (2021)                                                  |
| <i>Macrocystis pyrifera</i> | Peru    | Polynoidae no det.             | Annelida       | Carbajal et al. (2021)                                                  |
| <i>Macrocystis pyrifera</i> | Peru    | Porcellanidae no det.          | Arthropoda     | Carbajal et al. (2021)                                                  |
| <i>Macrocystis pyrifera</i> | Peru    | Porifera no det.               | Porifera       | Carbajal et al. (2021)                                                  |
| <i>Macrocystis pyrifera</i> | Peru    | <i>Potamilla</i> sp.           | Annelida       | Carbajal et al. (2021)                                                  |
| <i>Macrocystis pyrifera</i> | Chile   | <i>Priene scabrum</i>          | Mollusca       | Villegas et al. (2008)                                                  |
| <i>Macrocystis pyrifera</i> | Chile   | <i>Prolatilus jugularis</i>    | Chordata       | Angel and Ojeda (2001); Pérez-Matus et al. (2007)                       |
| <i>Macrocystis pyrifera</i> | Peru    | <i>Protomystides</i> sp.       | Annelida       | Carbajal et al. (2021)                                                  |
| <i>Macrocystis pyrifera</i> | Peru    | <i>Pseudopotamilla</i> sp.     | Annelida       | Carbajal et al. (2021)                                                  |
| <i>Macrocystis pyrifera</i> | Chile   | Ralstonia                      | Proteobacteria | Florez et al. (2019)                                                    |



| KELP                        | COUNTRY | TAXA                              | PHYLUM     | REFERENCE                                         |
|-----------------------------|---------|-----------------------------------|------------|---------------------------------------------------|
| <i>Macrocystis pyrifera</i> | Chile   | <i>Rhodymenia</i> spp.            | Rhodophyta | Vega et al. (2005)                                |
| <i>Macrocystis pyrifera</i> | Peru    | <i>Rhynchospio</i> sp.            | Annelida   | Carbajal et al. (2021)                            |
| <i>Macrocystis pyrifera</i> | Chile   | <i>Romaleon setosum</i>           | Arthropoda | Campos et al. (2020)                              |
| <i>Macrocystis pyrifera</i> | Peru    | Sabellidae no det.                | Annelida   | Carbajal et al. (2021)                            |
| <i>Macrocystis pyrifera</i> | Chile   | <i>Sarcodiotheca</i> sp.          | Rhodophyta | Campos et al. (2020)                              |
| <i>Macrocystis pyrifera</i> | Chile   | <i>Sardinops sagax</i>            | Chordata   | Angel and Ojeda (2001)                            |
| <i>Macrocystis pyrifera</i> | Chile   | <i>Scartichthys gigas</i>         | Chordata   | Angel and Ojeda (2001)                            |
| <i>Macrocystis pyrifera</i> | Chile   | <i>Schroederichthys chilensis</i> | Chordata   | Angel and Ojeda (2001)                            |
| <i>Macrocystis pyrifera</i> | Chile   | <i>Cheilotrema fasciatum</i>      | Chordata   | Angel and Ojeda (2001); Pérez-Matus et al. (2007) |
| <i>Macrocystis pyrifera</i> | Chile   | <i>Scomberomorus maculatus</i>    | Chordata   | Angel and Ojeda (2001)                            |
| <i>Macrocystis pyrifera</i> | Chile   | <i>Sebastes capensis</i>          | Chordata   | Angel and Ojeda (2001); Pérez-Matus et al. (2007) |
| <i>Macrocystis pyrifera</i> | Chile   | <i>Semicossyphus darwini</i>      | Chordata   | Pérez-Matus et al. (2007)                         |
| <i>Macrocystis pyrifera</i> | Peru    | <i>Semimytilus patagonicus</i>    | Mollusca   | Carbajal et al. (2021)                            |
| <i>Macrocystis pyrifera</i> | Chile   | <i>Seriolella violacea</i>        | Chordata   | Angel and Ojeda (2001)                            |
| <i>Macrocystis pyrifera</i> | Peru    | Spirorbidae no det.               | Annelida   | Carbajal et al. (2021)                            |
| <i>Macrocystis pyrifera</i> | Peru    | <i>Eulalia magalaensis</i>        | Annelida   | Carbajal et al. (2021)                            |
| <i>Macrocystis pyrifera</i> | Peru    | <i>Steggoa negra</i>              | Annelida   | Carbajal et al. (2021)                            |
| <i>Macrocystis pyrifera</i> | Peru    | <i>Eulalia peruana</i>            | Annelida   | Carbajal et al. (2021)                            |
| <i>Macrocystis pyrifera</i> | Chile   | <i>Stellifer minor</i>            | Chordata   | Angel and Ojeda (2001)                            |
| <i>Macrocystis pyrifera</i> | Peru    | <i>Sthenelais</i> sp.             | Annelida   | Carbajal et al. (2021)                            |
| <i>Macrocystis pyrifera</i> | Peru    | <i>Stramonita biserialis</i>      | Mollusca   | Carbajal et al. (2021)                            |

| KELP                        | COUNTRY | TAXA                             | PHYLUM        | REFERENCE                                                        |
|-----------------------------|---------|----------------------------------|---------------|------------------------------------------------------------------|
| <i>Macrocystis pyrifera</i> | Peru    | <i>Thaisella chocolata</i>       | Mollusca      | Carbajal et al. (2021)                                           |
| <i>Macrocystis pyrifera</i> | Chile   | <i>Strichaster striatus</i>      | Echinodermata | Villegas et al. (2008)                                           |
| <i>Macrocystis pyrifera</i> | Chile   | <i>Sunamphitoe lessoniophila</i> | Arthropoda    | Pérez-Schultheiss (2018)                                         |
| <i>Macrocystis pyrifera</i> | Peru    | Syllidae no det.                 | Annelida      | Carbajal et al. (2021)                                           |
| <i>Macrocystis pyrifera</i> | Peru    | <i>Syllidia liniata</i>          | Annelida      | Carbajal et al. (2021)                                           |
| <i>Macrocystis pyrifera</i> | Peru    | <i>Synalpheus spinifrons</i>     | Arthropoda    | Carbajal et al. (2021)                                           |
| <i>Macrocystis pyrifera</i> | Chile   | <i>Taliepus dentatus</i>         | Arthropoda    | Villegas et al. (2008)                                           |
| <i>Macrocystis pyrifera</i> | Chile   | <i>Taliepus marginatus</i>       | Arthropoda    | Jofre et al. (2013)                                              |
| <i>Macrocystis pyrifera</i> | Chile   | <i>Taliepus</i> sp.              | Arthropoda    | Winkler et al. (2017)                                            |
| <i>Macrocystis pyrifera</i> | Chile   | Tanaidacea no det.               | Arthropoda    | Hinojosa et al. (2010)                                           |
| <i>Macrocystis pyrifera</i> | Chile   | <i>Anatanaïs marmoratus</i>      | Arthropoda    | Winkler et al. (2017)                                            |
| <i>Macrocystis pyrifera</i> | Chile   | <i>Tegula atra</i>               | Mollusca      | Villegas et al. (2008)                                           |
| <i>Macrocystis pyrifera</i> | Peru    | <i>Tegula euryomphala</i>        | Mollusca      | Carbajal et al. (2021)                                           |
| <i>Macrocystis pyrifera</i> | Peru    | <i>Tegula luctuosa</i>           | Mollusca      | Carbajal et al. (2021)                                           |
| <i>Macrocystis pyrifera</i> | Peru    | <i>Tegula tridentata</i>         | Mollusca      | Carbajal et al. (2021)                                           |
| <i>Macrocystis pyrifera</i> | Chile   | <i>Tegula tridentata</i>         | Mollusca      | Villegas et al. (2008); Winkler et al. (2017)                    |
| <i>Macrocystis pyrifera</i> | Chile   | <i>Tetrapyrgus niger</i>         | Echinodermata | Vega et al. (2005); Villegas et al. (2008); Campos et al. (2020) |
| <i>Macrocystis pyrifera</i> | Chile   | <i>Thaisella chocolata</i>       | Mollusca      | Villegas et al. (2008)                                           |
| <i>Macrocystis pyrifera</i> | Peru    | <i>Thais</i> sp.                 | Mollusca      | Carbajal et al. (2021)                                           |
| <i>Macrocystis pyrifera</i> | Chile   | <i>Thyrsites atun</i>            | Chordata      | Angel and Ojeda (2001)                                           |
| <i>Macrocystis pyrifera</i> | Chile   | <i>Trachurus murphyi</i>         | Chordata      | Angel and Ojeda (2001)                                           |

| KELP                        | COUNTRY | TAXA                              | PHYLUM      | REFERENCE                |
|-----------------------------|---------|-----------------------------------|-------------|--------------------------|
| <i>Macrocystis pyrifera</i> | Peru    | <i>Trochita trochiformis</i>      | Mollusca    | Carbajal et al. (2021)   |
| <i>Macrocystis pyrifera</i> | Chile   | <i>Tylos spinulosus</i>           | Arthropoda  | Jaramillo et al. (2006)  |
| <i>Macrocystis pyrifera</i> | Peru    | <i>Syllis magdalena</i>           | Annelida    | Carbajal et al. (2021)   |
| <i>Macrocystis pyrifera</i> | Peru    | <i>Syllis magdalena</i>           | Annelida    | Carbajal et al. (2021)   |
| <i>Macrocystis pyrifera</i> | Peru    | <i>Syllis prolixa</i>             | Annelida    | Carbajal et al. (2021)   |
| <i>Macrocystis pyrifera</i> | Peru    | <i>Typosyllis</i> sp.             | Annelida    | Carbajal et al. (2021)   |
| <i>Macrocystis pyrifera</i> | Chile   | <i>Ulva</i> spp                   | Chlorophyta | Campos et al. (2020)     |
| <i>Macrocystis pyrifera</i> | Chile   | <i>Uromunna</i> sp.               | Arthropoda  | Winkler et al. (2017)    |
| <i>Macrocystis pyrifera</i> | Chile   | <i>Ventojassa frequens</i>        | Arthropoda  | Thiel and Vásquez (2000) |
| <i>Macrocystis pyrifera</i> | Chile   | <i>Ventojassa</i> sp.             | Arthropoda  | Winkler et al. (2017)    |
| <i>Macrocystis pyrifera</i> | Peru    | <i>Verruca laevigata</i>          | Arthropoda  | Carbajal et al. (2021)   |
| <i>Macrocystis pyrifera</i> | Chile   | <i>Xanthochorus cassidiformis</i> | Mollusca    | Campos et al. (2020)     |
| <i>Macrocystis pyrifera</i> | Peru    | <i>Xanthochorus buxeus</i>        | Mollusca    | Carbajal et al. (2021)   |
