# Supplementary material
Source: MDPI journal article supplement (https://www.mdpi.com/2673-964X/2/4/13)
Supplement: s1 [file s1]

**Table S1.** List of references selected for the systematic review of Ecosystem Services provided by Kelp Forests of the Humboldt Current System.

| REFERENCE                                                                                                                                                                                                                                                                                                                                               | SERVICE      | COUNTRY        |
|---------------------------------------------------------------------------------------------------------------------------------------------------------------------------------------------------------------------------------------------------------------------------------------------------------------------------------------------------------|--------------|----------------|
| Ospina-Alvarez, A.; de Juan, S.; Davis, K.J.; González, C.; Fernández, M.; Navarrete, S.A. Integration of biophysical connectivity in the spatial optimization of coastal ecosystem services. <i>Sci. Total Environ.</i> <b>2020</b> , <i>733</i> , 139367.                                                                                             | General      | Chile          |
| Ortiz, M.; Campos, L.; Berrios, F.; Rodriguez, F.; Hermosillo, B.; González, J. Network properties and keystone assessment in different intertidal communities dominated by two ecosystem engineer species (SE Pacific coast): a comparative analysis. <i>Ecol. Modell.</i> <b>2013</b> , <i>250</i> , 307–318.                                         | Supporting   | Chile          |
| Trujillo, J.E.; Pardo, L.M.; Vargas-Chacoff, L.; Valdivia, N. Sharks in the forest: relationships between kelp physical-complexity attributes and egg deposition sites of the red-spotted catshark. <i>Mar. Ecol. Prog. Ser.</i> <b>2019</b> , <i>610</i> , 125–135.                                                                                    | Supporting   | Chile          |
| Berrios, F.; Campbell, D.E.; Ortiz, M. Emergy evaluation of benthic ecosystems influenced by upwelling in northern Chile: contributions of the ecosystems to the regional economy. <i>Ecol. Modell.</i> <b>2017</b> , <i>359</i> , 146–164.                                                                                                             | General      | Chile          |
| De Juan, S.; Gelcich, S.; Ospina-Alvarez, A.; Perez-Matus, A.; Fernandez, M. Applying an ecosystem service approach to unravel links between ecosystems and society in the coast of central Chile. <i>Sci. Total Environ.</i> <b>2015</b> , <i>533</i> , 122–132.                                                                                       | General      | Chile          |
| Westermeyer, R.; Murúa, P.; Patiño, D.J.; Muñoz, L.; Ruiz, A.; Atero, C.; Muller, D. Utilization of holdfast fragments for vegetative propagation of <i>Macrocystis integrifolia</i> in Atacama, Northern Chile. <i>J. Appl. Phycol.</i> <b>2013</b> , <i>25</i> , 639–642.                                                                             | Provisioning | Chile          |
| Macaya, E.C.; Zuccarello, G.C. Genetic structure of the giant kelp <i>Macrocystis pyrifera</i> along the southeastern Pacific. <i>Mar. Ecol. Prog. Ser.</i> <b>2010</b> , <i>420</i> , 103–112.                                                                                                                                                         | Provisioning | Chile and Peru |
| Rothäusler, E.; Reinwald, H.; López, B. A.; Tala, F.; Thiel, M. High acclimation potential in floating <i>Macrocystis pyrifera</i> to abiotic conditions even under grazing pressure—a field study. <i>J. Phycol.</i> <b>2018</b> , <i>54</i> , 368–379.                                                                                                | Supporting   | Chile          |
| Santelices, B. The discovery of kelp forests in deep-water habitats of tropical regions. <i>Proc. Natl. Acad. Sci. U.S.A.</i> <b>2007</b> , <i>104</i> , 19163–19164.                                                                                                                                                                                   | Supporting   | Chile          |
| Salavarría, E.; Macaya, E.; Gil-Kodaka, P.; Paul, S.; Troccoli, L. Haplotype diversity of <i>Macrocystis pyrifera</i> (Phaeophyceae: Laminariales) in the central and southern coast of Peru. <i>Pan-Am. J. Aquat. Sci.</i> <b>2018</b> , <i>13</i> , 311–319.                                                                                          | Provisioning | Peru           |
| Pérez-Araneda, K.; Zevallos, S.; Arakaki, N.; Gamarra, A.; Carbajal, P.; Tellier, F. <i>Lessonia berteriana</i> en Perú: Comprobación de la identidad de la especie y diversidad genética en el borde norte de distribución. <i>Rev. Biol. Mar. Oceanogr.</i> <b>2020</b> , <i>55</i> , 270–276.                                                        | Provisioning | Chile and Peru |
| Tellier, F.; Meynard, A.P.; Correa, J.A.; Faugeton, S.; Valero, M. Phylogeographic analyses of the 30° S south-east Pacific biogeographic transition zone establish the occurrence of a sharp genetic discontinuity in the kelp <i>Lessonia nigrescens</i> : Vicariance or parapatry?. <i>Mol. Phylogenet. Evol.</i> <b>2009</b> , <i>53</i> , 679–693. | Provisioning | Chile          |
| Vásquez, J.A.; Zuñiga, S.; Tala, F.; Piaget, N.; Rodríguez, D.C.; Vega, J.M. Economic valuation of kelp forests in northern Chile: values of goods and services of the ecosystem. <i>J. Appl. Phycol.</i> <b>2014</b> , <i>26</i> , 1081–1088.                                                                                                          | General      | Chile          |
| Rodríguez, S.R.; Ojeda, F.P. Distribution patterns of <i>Tetrapygus niger</i> (Echinodermata: Echinoidea) off the central Chilean coast. <i>Mar. Ecol. Prog. Ser.</i> <b>1993</b> , <i>101</i> , 157–162.                                                                                                                                               | Supporting   | Chile          |
| Villegas, M.J.; Laudien, J.; Sielfeld, W.; Arntz, W.E. <i>Macrocystis integrifolia</i> and <i>Lessonia trabeculata</i> (Laminariales; Phaeophyceae) kelp habitat structures and associated macrobenthic community off northern Chile. <i>Helgol. Mar. Res.</i> <b>2008</b> , <i>62</i> , 33–43.                                                         | Supporting   | Chile          |
| Ruiz, J.; Ibáñez, C.M.; Cáceres, C.W. Morfometría del tubo digestivo y alimentación del pepino de mar <i>Athyridium chilensis</i> (Semper, 1868) (Echinodermata: Holothuroidea). <i>Rev. Biol. Mar. Oceanogr.</i> <b>2007</b> , <i>42</i> , 269–274.                                                                                                    | Supporting   | Chile          |

| REFERENCE                                                                                                                                                                                                                                                                                                                    | SERVICE      | COUNTRY |
|------------------------------------------------------------------------------------------------------------------------------------------------------------------------------------------------------------------------------------------------------------------------------------------------------------------------------|--------------|---------|
| Miranda, L.; Thiel, M. Active and passive migration in boring isopods <i>Limnoria</i> spp. (Crustacea, Peracarida) from kelp holdfasts. <i>J. Sea Res.</i> <b>2008</b> , <i>60</i> , 176–183.                                                                                                                                | Supporting   | Chile   |
| Duarte, C.; Jaramillo, E.; Contreras, H. Macroalgas varadas sobre la superficie de una playa arenosa del sur de Chile: preferencias alimentarias y de hábitat de juveniles y adultos de <i>Orchestoidea tuberculata</i> (Nicolet), (Amphipoda, Talitridae). <i>Rev. Chil. de Hist. Nat.</i> <b>2008</b> , <i>81</i> , 69–81. | Supporting   | Chile   |
| Ortega, K.J.; Avaria, C.A.S.; Macaya, E.C. Changes in invertebrate assemblages inhabiting <i>Lessonia spicata</i> (Phaeophyceae) holdfasts after the 2010 earthquake-mediated coastal uplift in Chile. <i>Rev. Biol. Mar. Oceanogr.</i> <b>2014</b> , <i>49</i> , 129–134.                                                   | Supporting   | Chile   |
| Pérez-Schultheiss, J. Ampliación del rango de distribución de <i>Sunamphitoe lessoniophila</i> (Conlan y Bousfield, 1982) (Amphipoda: Senticaudata: Ampithoidae) en la costa de Chile. <i>Bol. Mus. Nac. Hist. Nat.</i> <b>2018</b> , <i>67</i> , 173–179.                                                                   | Supporting   | Chile   |
| Álvarez-Campos, P.; Verdes, A. Syllids inhabiting holdfasts of <i>Lessonia spicata</i> in Central Chile: diversity, systematics, and description of three new species. <i>Syst. Biodivers.</i> <b>2017</b> , <i>15</i> , 520–531.                                                                                            | Supporting   | Chile   |
| Munoz, M.; Santelices, B. Determination of the distribution and abundance of the limpet <i>Scurria scurra</i> on the stipes of the kelp <i>Lessonia nigrescens</i> in Central Chile. <i>Mar. Ecol. Prog. Ser.</i> <b>1989</b> , <i>54</i> , 277–285.                                                                         | Supporting   | Chile   |
| Winkler, N.S.; Pérez-Matus, A.; Villena, Á.A.; Thiel, M. Seasonal variation in epifaunal communities associated with giant kelp ( <i>Macrocystis pyrifera</i> ) at an upwelling-dominated site. <i>Austral Ecol.</i> <b>2017</b> , <i>42</i> , 132–144.                                                                      | Provisioning | Chile   |
| Cerda, O.; Hinojosa, I.A.; Thiel, M. Nest-building behavior by the amphipod <i>Peramphithoe femorata</i> (Krøyer) on the kelp <i>Macrocystis pyrifera</i> (Linnaeus) C. Agardh from northern-central Chile. <i>Biol. Bull.</i> <b>2010</b> , <i>218</i> , 248–258.                                                           | Supporting   | Chile   |
| Gutow, L.; Long, J.D.; Cerda, O.; Hinojosa, I.A.; Rothäusler, E.; Tala, F.; Thiel, M. Herbivorous amphipods inhabit protective microhabitats within thalli of giant kelp <i>Macrocystis pyrifera</i> . <i>Mar. Biol.</i> <b>2012</b> , <i>159</i> , 141–149.                                                                 | Supporting   | Chile   |
| Gutow, L.; Poore, A.G.; Díaz Poblete, M.A.; Villalobos, V.; Thiel, M. Small burrowing amphipods cause major damage in a large kelp. <i>Proc. Royal Soc. B.</i> <b>2020</b> , <i>287</i> , 20200330.                                                                                                                          | Supporting   | Chile   |
| Orejas, C.; Gili, J.M.; Alvà, V.; Arntz, W. Predatory impact of an epiphytic hydrozoan in an upwelling area in the Bay of Coliumo (Dichato, Chile). <i>J. Sea Res.</i> <b>2000</b> , <i>44</i> , 209–220.                                                                                                                    | Supporting   | Chile   |
| Carbajal, P.; Gamarra-Salazar, A.; Moore, P. J.; Pérez-Matus, A. Different kelp species support unique macroinvertebrate assemblages, suggesting the potential community-wide impacts of kelp harvesting along the Humboldt Current System. <i>Aquat. Conserv.: Mar. Freshw. Ecosyst.</i> <b>2022</b> , <i>32</i> , 14–27.   | Supporting   | Peru    |
| Cancino, J.; Santelices, B. Importancia ecológica de los discos adhesivos de <i>Lessonia nigrescens</i> Bory (Phaeophyta). <i>Rev. Chil. de Hist. Nat.</i> <b>1984</b> , <i>57</i> , 23–33.                                                                                                                                  | Supporting   | Chile   |
| Bularz, B.; Fernández, M.; Subida, M. D.; Wieters, E. A.; Pérez-Matus, A. Effects of harvesting on subtidal kelp forests ( <i>Lessonia trabeculata</i> ) in central Chile. <i>Ecosphere.</i> <b>2022</b> , <i>13</i> , e3958.                                                                                                | Provisioning | Chile   |
| Angel, A.; Ojeda, F. P. Structure and trophic organization of subtidal fish assemblages on the northern Chilean coast: the effect of habitat complexity. <i>Mar. Ecol. Prog. Ser.</i> <b>2001</b> , <i>217</i> , 81–91.                                                                                                      | Supporting   | Chile   |
| Medina-Vogel, G.; Rodríguez, C. D.; Alvarez, R. P.; Bartheld, J. L. V. Feeding ecology of the marine otter ( <i>Lutra felina</i> ) in a rocky seashore of the south of Chile. <i>Mar. Mamm. Sci.</i> <b>2004</b> , <i>20</i> , 134–144.                                                                                      | Supporting   | Chile   |
| Pérez-Matus, A.; Ferry-Graham, L. A.; Cea, A.; Vásquez, J. A. Community structure of temperate reef fishes in kelp-dominated subtidal habitats of northern Chile. <i>Mar. Freshw. Res.</i> <b>2007</b> , <i>58</i> , 1069–1085.                                                                                              | Supporting   | Chile   |

| REFERENCE                                                                                                                                                                                                                                                                                                                                                                  | SERVICE    | COUNTRY |
|----------------------------------------------------------------------------------------------------------------------------------------------------------------------------------------------------------------------------------------------------------------------------------------------------------------------------------------------------------------------------|------------|---------|
| Gelcich, S.; Fernández, M.; Godoy, N.; Canepa, A.; Prado, L.; Castilla, J. C. Territorial user rights for fisheries as ancillary instruments for marine coastal conservation in Chile. <i>Conservar. Biol.</i> <b>2012</b> , 26, 1005-1015.                                                                                                                                | Supporting | Chile   |
| Perez-Matus, A.; Pledger, S.; Díaz, F. J.; Ferry, L. A.; Vásquez, J. A. Plasticidad en la selección de alimento y estructura trófica de los peces asociados a bosques de macroalgas pardas del norte de Chile. <i>Rev. Chil. de Hist. Nat.</i> <b>2012</b> , 85, 29-48.                                                                                                    | Supporting | Chile   |
| Pérez-Matus, A.; Sánchez, F.; González-But, J. C.; Lamb, R. W. Understory algae associations and predation risk influence broad-scale kelp habitat use in a temperate reef fish. <i>Mar. Ecol. Prog. Ser.</i> <b>2016</b> , 559, 147-158.                                                                                                                                  | Supporting | Chile   |
| Lozano-Muñoz, I.; Giorgio, C.; Jurij, W.; German, B. Herbivore Fish as Sustainable Alternative for Nutrition Security: Food Habits and Nutritional Composition of the Acha Fish ( <i>Medialuna Ancietae</i> ) in Northern Chile. <i>Sci. Rep.</i> <b>2021</b> (submitted).                                                                                                 | Supporting | Chile   |
| Ruz, C. S.; Garmendia, V.; Muñoz-Cordovez, R.; Wieters, E.; Pérez-Matus, A. Observaciones del desarrollo temprano de la doncellita, <i>Myxodes viridis</i> (Clinidae), y la primera descripción de su hábitat de desove en bosques de macroalgas pardas submareales ( <i>Lessonia trabeculata</i> ). <i>Rev. Biol. Mar. Oceanogr.</i> <b>2021</b> , 56, 66-73.             | Supporting | Chile   |
| Benavides, A. G.; Cancino, J. M.; Ojeda, F. P. Ontogenetic Changes in Gut Dimensions and Macroalgal Digestibility in the Marine Herbivorous Fish, <i>Aplodactylus punctatus</i> . <i>Funct. Ecol.</i> <b>1994</b> , 8, 46-51                                                                                                                                               | Supporting | Chile   |
| Fariña, J. M.; Ojeda, F. P. Abundance, activity, and trophic patterns of the redspotted catshark, <i>Schroederichthys chilensis</i> , on the Pacific temperate coast of Chile. <i>Copeia</i> . <b>1993</b> , 1993, 545-549.                                                                                                                                                | Supporting | Chile   |
| Flores, D.; Adams, G. D. Observaciones sobre el comportamiento de <i>Schroederichthys chilensis</i> (Carcharhiniformes, Scyliorhinidae). <i>Rev. Peru. Biol.</i> <b>2014</b> , 21, 275-276.                                                                                                                                                                                | Supporting | Peru    |
| Hockey, P. A. R. Kelp gulls <i>Larus dominicanus</i> as predators in kelp <i>Macrocystis pyrifera</i> beds. <i>Oecologia</i> . <b>1988</b> , 76, 155-157.                                                                                                                                                                                                                  | Supporting | Chile   |
| Castilla, J. C.; Bahamondes, I. Observaciones conductuales y ecológicas sobre <i>Lutra felina</i> (Molina) 1782 (Carnivora: Mustelidae) en las zonas central y centro-norte de Chile. <i>Arch. Biol. Med. Exp.</i> <b>1979</b> , 12, 119-132.                                                                                                                              | Supporting | Chile   |
| Jaramillo, E.; De la Huz, R.; Duarte, C.; Contreras, H. Algal wrack deposits and macroinfaunal arthropods on sandy beaches of the Chilean coast. <i>Rev. Chil. de Hist. Nat.</i> <b>2006</b> , 79, 337-351.                                                                                                                                                                | Supporting | Chile   |
| Thiel, M.; Vásquez, J.A. Are kelp holdfasts islands on the ocean floor? - indication for temporarily closed aggregations of peracarid crustaceans. In <i>Island, ocean and deep-sea biology. Developments in Hydrobiology</i> ; Jones, M.B., Azevedo, J.M.N., Neto, A.I., Costa, A.C., Martins, A.M.F., Eds.; Springer: Dordrecht, Netherlands, 2000; Vol. 152, pp. 45-54. | Supporting | Chile   |
| Hinojosa, I.; Boltaña, S.; Lancellotti, D.; Macaya, E.; Ugalde, P.; Valdivia, N.; Vásquez, N.; Newman, W.A.; Thiel, M. Distribución geográfica y descripción de cuatro especies de cirripedios pelágicos a lo largo de la costa chilena del Pacífico sur este-una aproximación zoogeográfica. <i>Rev. Chil. de Hist. Nat.</i> <b>2006</b> , 79, 13-27.                     | Supporting | Chile   |
| Duarte, C.; Jaramillo, E.; Contreras, H.; Acuña, K.; Navarro, J. M. Importancia del subsidio de macroalgas sobre la abundancia y biología poblacional del anfípodo <i>Orchestoidea tuberculata</i> (Nicolet) en playas arenosas del centro sur de Chile. <i>Rev. Biol. Mar. Oceanogr.</i> <b>2009</b> , 44, 691-702.                                                       | Supporting | Chile   |
| Duarte, C.; Acuña, K.; Navarro, J.M.; Gómez, I.; Jaramillo, E.; Quijón, P. Variable feeding behavior in <i>Orchestoidea tuberculata</i> (Nicolet 1849): exploring the relative importance of macroalgal traits. <i>J. Sea Res.</i> <b>2014</b> , 87, 1-7.                                                                                                                  | Supporting | Chile   |
| Hinojosa, I.A.; González, E.R.; Macaya, E.; Thiel, M. Macroalgas flotantes en el mar interior de Chiloé, Chile y su fauna asociada con énfasis en peracarida y estados temprano de desarrollo de decapoda (crustacea). <i>Tecnol. y Cienc. del Agua</i> , <b>2010</b> , 33, 71-86.                                                                                         | Supporting | Chile   |

| REFERENCE                                                                                                                                                                                                                                                                                                   | SERVICE      | COUNTRY        |
|-------------------------------------------------------------------------------------------------------------------------------------------------------------------------------------------------------------------------------------------------------------------------------------------------------------|--------------|----------------|
| González, S.A.; Yáñez-Navea, K.; Muñoz, M. Effect of coastal urbanization on sandy beach coleoptera <i>Phaleria maculata</i> (Kulzer, 1959) in northern Chile. <i>Mar. Pollut. Bull.</i> <b>2014</b> , <i>83</i> , 265–274.                                                                                 | Supporting   | Chile          |
| Tala, F.; Velásquez, M.; Mansilla, A.; Macaya, E.C.; Thiel, M. Latitudinal and seasonal effects on short-term acclimation of floating kelp species from the South-East Pacific. <i>J. Exp. Mar. Biol. Ecol.</i> <b>2016</b> , <i>483</i> , 31–41.                                                           | Supporting   | Chile          |
| Carrasco, S. A.; Vandecasteele, L.; Rivadeneira, M. M.; Fernández, M.; Pérez-Matus, A. Spatial and short-term variability of larval, post-larval and macrobenthic assemblages associated with subtidal kelp forest ecosystems in Central Chile. <i>Mar. Biol. Res.</i> <b>2017</b> , <i>13</i> , 1041-1058. | Supporting   | Chile          |
| Aller-Rojas, O.; Moreno, B.; Aponte, H.; Zavala, J. Carbon storage estimation of <i>Lessonia trabeculata</i> kelp beds in Southern Peru: an analysis from the San Juan de Marcona region. <i>Carbon Mang.</i> <b>2020</b> , <i>11</i> , 525-532.                                                            | Regulating   | Peru           |
| Manríquez, P.H.; Cancino, J.M. Bryozoan-macroalgal interactions: do epibionts benefit? <i>Mar. Ecol. Prog. Ser.</i> <b>1996</b> , <i>138</i> , 189–197.                                                                                                                                                     | Supporting   | Chile          |
| Venegas, M.; Matsushiro, B.; Edding, M. E. Alginate composition of <i>Lessonia trabeculata</i> (Phaeophyta: Laminariales) growing in exposed and sheltered habitats. <i>Botanica Marina.</i> <b>1993</b> , <i>36</i> , 47-52.                                                                               | Provisioning | Chile          |
| Zuniga-Jara, S.; Marín-Riffo, M. C.; Bulboa-Contador, C. Bioeconomic analysis of giant kelp <i>Macrocystis pyrifera</i> cultivation (Laminariales; Phaeophyceae) in northern Chile. <i>J. Appl. Phycol.</i> <b>2016</b> , <i>28</i> , 405-416.                                                              | Provisioning | Chile          |
| Dantagnan, P.; Hernández, A.; Borquez, A.; Mansilla, A. Inclusion of macroalgae meal ( <i>Macrocystis pyrifera</i> ) as feed ingredient for rainbow trout ( <i>Oncorhynchus mykiss</i> ): effect on flesh fatty acid composition. <i>Aquac. Res.</i> <b>2009</b> , <i>41</i> , 87-94.                       | Provisioning | Chile          |
| Valiente, O.; Mogollón, E. Contenido de Ácido Algínico, Manitol y Laminarano en Algas Pardas de Importancia Económica. <i>Bol. Investig. Ins. Tec. Prod. Peru</i> , <b>2013</b> , <i>11</i> , 91-98.                                                                                                        | Provisioning | Peru           |
| Camus, C.; Ballerino, P.; Delgado, R.; Olivera-Nappa Á.; Leyton, C.; Buschmann, A. H. Scaling up bioethanol production from the farmed brown macroalga <i>Macrocystis pyrifera</i> in Chile. <i>Biofuels Bioprod. Biorefin.</i> <b>2016</b> , <i>10</i> , 673-685.                                          | Provisioning | Chile          |
| Vásquez, J. A.; Piaget, N.; Vega, J. M. The <i>Lessonia nigrescens</i> fishery in northern Chile: “how you harvest is more important than how much you harvest”. <i>J. Appl. Phycol.</i> <b>2012</b> , <i>24</i> , 417-426.                                                                                 | Provisioning | Chile          |
| Gelcich, S.; Godoy, N.; Prado, L.; Castilla, J. C. Add-on conservation benefits of marine territorial user rights fishery policies in central Chile. <i>Ecol. Appl.</i> <b>2008</b> , <i>18</i> , 273-281.                                                                                                  | Supporting   | Chile          |
| Camus, C.; Buschmann, A. H. <i>Macrocystis pyrifera</i> aquafarming: Production optimization of rope-seeded juvenile sporophytes. <i>Aquaculture.</i> <b>2017</b> , <i>468</i> , 107-114.                                                                                                                   | Provisioning | Chile          |
| Jofre, D.; Ortiz, M.; Thiel, M. Demography and feeding behavior of the kelp crab <i>Taliepus marginatus</i> in subtidal habitats dominated by the kelps <i>Macrocystis pyrifera</i> or <i>Lessonia trabeculata</i> . <i>Invertebr. Biol.</i> <b>2013</b> , <i>2</i> , 133-144.                              | Supporting   | Chile          |
| Erlandson, J. M.; Graham, M. H.; Bourque, B. J.; Corbett, D.; Estes, J. A.; Steneck, R. S. The kelp highway hypothesis: marine ecology, the coastal migration theory, and the Peopling of the Americas. <i>J. Island Coast. Archaeol.</i> <b>2007</b> , <i>2</i> , 161-174.                                 | Cultural     | Chile and Peru |
| Vásquez, J. A. Ecology of <i>Loxechinus albus</i> . In <i>Developments in Aquaculture and Fisheries Science</i> ; Lawrence, J. M., Eds.; Elsevier, 2007; Volume 37, pp. 227-241.                                                                                                                            | Supporting   | Chile          |
| Gonzalez, S. J.; Cáceres, C. W.; Ojeda, F. P. Feeding and nutritional ecology of the edible sea urchin <i>Loxechinus albus</i> in the northern Chilean coast. <i>Rev. Chil. de Hist. Nat.</i> <b>2008</b> , <i>81</i> , 575-584.                                                                            | Supporting   | Chile          |
| González, C. P.; Edding, M.; Tala, F.; Torres, R.; Manríquez, P. H. Exposure time modulates the effects of climate change-related stressors on fertile sporophytes and early-life stage performance of a habitat-forming kelp species. <i>Environ. Pollut.</i> <b>2021</b> , <i>286</i> , 117224.           | Regulating   | Chile          |



| REFERENCE                                                                                                                                                                                                                                                                                                                                                                                    | SERVICE      | COUNTRY |
|----------------------------------------------------------------------------------------------------------------------------------------------------------------------------------------------------------------------------------------------------------------------------------------------------------------------------------------------------------------------------------------------|--------------|---------|
| González, C. P.; Edding, M.; Torres, R.; Manríquez, P. H. Increased temperature but not pCO <sub>2</sub> levels affect early developmental and reproductive traits of the economically important habitat-forming kelp <i>Lessonia trabeculata</i> . <i>Mar. Pollut. Bull.</i> <b>2018</b> , 135, 694-703.                                                                                    | Regulating   | Chile   |
| Vega, J. A.; Vásquez, J. A.; Buschmann, A. H. Population biology of the subtidal kelps <i>Macrocystis integrifolia</i> and <i>Lessonia trabeculata</i> (Laminariales, Phaeophyceae) in an upwelling ecosystem of northern Chile: interannual variability and El Niño 1997-1998. <i>Rev. Chil. de Hist. Nat.</i> <b>2005</b> , 78, 33-50.                                                     | Supporting   | Chile   |
| Cáceres, C. W.; Benavides, A. G.; Ojeda, F. P. Ecología trófica del pez herbívoro <i>Aplodactylus punctatus</i> (Pisces: Aplodactylidae) en la costa centro-norte de Chile. <i>Rev. Chil. de Hist. Nat.</i> <b>1993</b> , 66, 185-194.                                                                                                                                                       | Supporting   | Chile   |
| Perreault, M. C.; Borgeaud, I. A.; Gaymer, C. F. Impact of grazing by the sea urchin <i>Tetrapygus niger</i> on the kelp <i>Lessonia trabeculata</i> in Northern Chile. <i>J. Exp. Mar. Biol. Ecol.</i> <b>2014</b> , 453, 22-27.                                                                                                                                                            | Supporting   | Chile   |
| Martínez, E.; Correa, J.A. Sorus-specific epiphytism affecting the kelps <i>Lessonia nigrescens</i> and <i>L. trabeculata</i> (Phaeophyta). <i>Mar. Ecol. Prog. Ser.</i> <b>1993</b> , 96, 83-92.                                                                                                                                                                                            | Supporting   | Chile   |
| Häussermann, V.; Försterra, G. A new species of sea anemone from Chile, <i>Anemonia alicemartinae</i> n. sp. (Cnidaria: Anthozoa). An invader or an indicator for environmental change in shallow water?. <i>Org. Divers. Evol.</i> <b>2001</b> , 1, 211-224.                                                                                                                                | Supporting   | Chile   |
| Cárdenas, C. A.; Cañete, J. I.; Oyarzún, S.; Mansilla, A. Podding of juvenile king crabs <i>Lithodes santolla</i> (Molina, 1782) (Crustacea) in association with holdfasts of <i>Macrocystis pyrifera</i> (Linnaeus) C. Agardh, 1980. <i>Investig. Mar.</i> <b>2007</b> , 35, 105-110.                                                                                                       | Supporting   | Chile   |
| Vásquez, J.A. Production, use and fate of Chilean brown seaweeds: re-sources for a sustainable fishery. <i>J. Appl. Phycol.</i> <b>2008</b> , 20, 457.                                                                                                                                                                                                                                       | Provisioning | Chile   |
| Perez-Schultheiss, J.; Crespo, J.E. A new species of <i>Parhyalella Kunkel</i> , 1910 (Amphipoda, Talitroidea, Dogielinotidae) from the coast of Chile. <i>Zootaxa</i> . <b>2008</b> , 1724, 61-68.                                                                                                                                                                                          | Supporting   | Chile   |
| Gelcich, S.; Hughes, T.; Olsson, P.; Folke, C.; Defeo, O.; Fernandez, M.; Foale, S.; Gunderson, L.; Rodriguez-Sickert, C.; Scheffer, M.; et al. Navigating transformations in governance of Chilean Marine Coastal Resources. <i>PNAS</i> . <b>2010</b> , 107, 16794-16799.                                                                                                                  | Provisioning | Chile   |
| Buschmann, A. H.; Prescott, S.; Potin, P.; Faugeton, S.; Vásquez, J. A.; Camus, C.; Infante, J.; Hernández-González, M. C.; Gutierrez, A.; Varela, D. A. The status of kelp exploitation and marine agronomy, with emphasis on <i>Macrocystis pyrifera</i> , in Chile. <i>Adv. Bot. Res.</i> <b>2014</b> , 71, 161-188                                                                       | Provisioning | Chile   |
| Perez-Matus, A.; Carrasco, S. A.; Ospina-Alvarez, A. Length-weight relationships for 25 kelp forest-associated fishes of northern and central Chile. <i>Rev. Biol. Mar. Oceanogr.</i> <b>2014</b> , 49, 141-145.                                                                                                                                                                             | Supporting   | Chile   |
| González, A. V.; Santelices, B. Frequency of chimerism in populations of the kelp <i>Lessonia spicata</i> in central Chile. <i>Plos One</i> , <b>2017</b> , 12, e0169182.                                                                                                                                                                                                                    | Provisioning | Chile   |
| Ceh, J.; Riascos, J.M. Cryptic life stages in scyphozoan jellyfish: larval settlement preferences of the South American sea nettle <i>Chrysaora plocamia</i> . <i>J. Exp. Mar. Biol. Ecol.</i> <b>2017</b> , 490, 52-55.                                                                                                                                                                     | Supporting   | Chile   |
| Florez, J.Z.; Camus, C.; Hengst, M.B.; Marchant, F.; Buschmann, A.H. Structure of the epiphytic bacterial communities of <i>Macrocystis pyrifera</i> in localities with contrasting nitrogen concentrations and temperature. <i>Algal Res.</i> <b>2019</b> , 44, 101706.                                                                                                                     | Supporting   | Chile   |
| Murúa, P.; Edrada-Ebel, R.; Muñoz, L.; Soldatou, S.; Legrave, N.; Müller, D. G.; Patiño, D. J.; Van West, P.; Küpper, F. C.; Westermeier, R.; et al. Morphological, genotypic and metabolomic signatures confirm interfamilial hybridization between the ubiquitous kelps <i>Macrocystis</i> (Arthrothamnaceae) and <i>Lessonia</i> (Lessoniaceae). <i>Sci. Rep.</i> <b>2020</b> , 10, 1-15. | Provisioning | Chile   |
| Campos, L.; Ortiz, M.; Rodríguez-Zaragoza, F. A.; Oses, R. Macrobenthic community establishment on artificial reefs with <i>Macrocystis pyrifera</i> over barren-ground and soft-bottom habitats. <i>Glob. Ecol. Conserv.</i> <b>2020</b> , 23, e01184.                                                                                                                                      | Supporting   | Chile   |

| REFERENCE                                                                                                                                                                                                                        | SERVICE    | COUNTRY        |
|----------------------------------------------------------------------------------------------------------------------------------------------------------------------------------------------------------------------------------|------------|----------------|
| Tegner, M. J.; Dayton, P. K. Ecosystem effects of fishing in kelp forest communities, <i>ICES J. Mar. Sci.</i> <b>2020</b> , 57, 579–589.                                                                                        | Supporting | Chile and Peru |
| González-Roca, F.; Gelcich, S.; Pérez-Ruzafa, Á.; Vega, J. A.; Vásquez, J. A. Exploring the role of access regimes over an economically important intertidal kelp species. <i>Ocean Coast. Manag.</i> <b>2021</b> , 212, 105811. | Supporting | Chile          |
